1           Increased production of the extracellular polysaccharide Psl can give a growth  
2                           advantage to *Pseudomonas aeruginosa* in low-iron conditions

3  
4   Jaime Hutchison<sup>1,¶,#a</sup>, Karishma Kaushik<sup>1,2,¶</sup>, Christopher A. Rodesney<sup>1,3</sup>, Thomas  
5   Lillieholm<sup>1</sup>, Layla Bakhtiari<sup>1,3</sup>, Vernita D. Gordon<sup>1,3,4\*</sup>

6  
7   <sup>1</sup> Center for Nonlinear Dynamics, University of Texas at Austin, Austin, TX 78712, USA

8  
9   <sup>2</sup> Biology Instructional Office, University of Texas at Austin, Austin, TX 78712, USA

10  
11   <sup>3</sup> Department of Physics, University of Texas at Austin, Austin, TX 78712, USA

12  
13   <sup>4</sup> Institute for Cellular and Molecular Biology, University of Texas at Austin, Austin, TX  
14   78712, USA

15  
16   #a Current address: Solvay R&I Center, 350 George Patterson Boulevard, Bristol, PA  
17   19007, USA

18  
19   \* Corresponding author:

20   [gordon@chaos.utexas.edu](mailto:gordon@chaos.utexas.edu)

21  
22   ¶ These authors contributed equally to this work.

23

24

## 25 Abstract

26 In infections, biofilm formation is associated with a number of fitness advantages, such  
27 as resistance to antibiotics and to clearance by the immune system. Biofilm formation  
28 has also been linked to fitness advantages in environments other than *in vivo* infections;  
29 primarily, biofilms are thought to help constituent organisms evade predation and to  
30 promote intercellular signaling. The opportunistic human pathogen *Pseudomonas*  
31 *aeruginosa* forms biofilm infections in lungs, wounds, and on implants and medical  
32 devices. However, the tendency toward biofilm formation originated in this bacterium's  
33 native environment, primarily plants and soil. Such environments are polymicrobial and  
34 often resource-limited. Other researchers have recently shown that the *P. aeruginosa*  
35 extracellular polysaccharide Psl can bind iron. For the lab strain PA01, Psl is also the  
36 dominant adhesive and cohesive “glue” holding together multicellular aggregates and  
37 biofilms. Here, we perform quantitative time-lapse confocal microscopy and image  
38 analysis of early biofilm growth by PA01. We find that aggregates of *P. aeruginosa* have  
39 a growth advantage over single cells of *P. aeruginosa* in the presence of *Staphylococcus*  
40 *aureus* in low-iron environments. Our results suggest the growth advantage of  
41 aggregates is linked to their high Psl content and to the production of an active factor by  
42 *S. aureus*. We posit that the ability of Psl to promote iron acquisition may have been  
43 linked to the evolutionary development of the strong biofilm-forming tendencies of *P.*  
44 *aeruginosa*.

## 45 Introduction

46 Biofilms are sessile communities of interacting microbes that are embedded in a  
47 matrix dominated by extracellular polysaccharides (EPS) that holds bacteria in place [1-  
48 4]. For infections, being in a biofilm confers advantages on the constituent bacteria by  
49 helping them resist antibiotics and evade the immune system [5-8]. *Pseudomonas*  
50 *aeruginosa*, is an opportunistic pathogen that forms biofilms in many scenarios: in the  
51 lungs of patients with Cystic Fibrosis and Chronic Obstructive Pulmonary Disease; in  
52 chronic wounds, especially but not exclusively in patients with diabetes; and on implanted  
53 medical devices [7, 9-12]. However, *P. aeruginosa* has its primary home, and much of  
54 its evolutionary history, on soil and plants [13-15]. Other researchers have shown that, in  
55 such natural environments, aggregation might help protect against predation and  
56 chemical attack, and allow beneficial inter-cellular cooperative behaviors [16-20].  
57 However, little is known about how EPS-driven aggregation may be linked to resource  
58 acquisition and resulting growth advantage and to the chemical properties of specific EPS  
59 types. This gap in knowledge prevents the development of ecology-based strategies for  
60 thwarting harmful biofilms or promoting beneficial biofilms.

61 In this work, we find that when iron is a limiting resource, multicellular aggregates  
62 of *P. aeruginosa* have a growth advantage over *P. aeruginosa* single cells that is linked  
63 to iron acquisition and to the presence of *Staphylococcus aureus*. *S. aureus* is a Gram-  
64 negative bacterium that is often found as a co-pathogen in *P. aeruginosa* biofilm  
65 infections, and can also be thought of as a token representation of the diverse microbial  
66 populations in the ecologies in which *P. aeruginosa* evolved. We also find that the

67 enhanced growth of aggregates is linked to aggregates having higher amounts of the  
68 extracellular polysaccharide Psl than have single cells. Therefore, we infer that the need  
69 to acquire and use iron, as a vital growth substrate, could result in a competitive  
70 advantage to the production of Psl, which both binds iron [21] and also promotes  
71 intercellular aggregation and biofilm formation.

72 In contrast to the present work, we have previously shown that, in monoculture  
73 biofilms of *Pseudomonas aeruginosa* grown in flow cells, aggregates can have a growth  
74 advantage over single cells *when the competition for growth resources is high* [22]. We  
75 attributed this effect to cells at the top of the aggregate having greater access to growth  
76 resources, which are supplied diffusively from far above the floor of the flow cell, where  
77 the single cells are attached [22]. Thus, the growth advantage we found for aggregates  
78 in our previous work is a direct consequence of both the three-dimensional structure of  
79 aggregates and the spatial structure of the environment. Our earlier work also showed  
80 that when competition for resources is low, aggregates have a growth disadvantage  
81 compared with single cells [22]. This arises because cells in the interior of the aggregate  
82 have lower access to growth resources than do single cells. Although this disadvantage  
83 is present regardless of the level of competition for resources, it puts the aggregates at  
84 an *overall* disadvantage compared with single cells only when the competition for  
85 resources is low.

86 Unlike our earlier work comparing aggregates with single cells in monoculture [22],  
87 the iron- and Psl-linked advantage for aggregates that we investigate here does not  
88 depend on competition or on vertical structure of the aggregates or the environment.

## 89 **Materials and Methods**

### 90 **Bacterial strains**

91 All strains of *Pseudomonas aeruginosa* were in the background of the PA01 lab  
92 strain and were obtained from Colin Manoil at the University of Washington [23]. PA01  
93 biofilms and aggregates are Psl-dependent and –dominated [24]. To allow visualization  
94 by confocal fluorescence microscopy, wild-type (WT) PA01 strains were tagged with  
95 mCherry *via* Tn7 transformation and  $\Delta pel$  PA01 strains were tagged with green  
96 fluorescent protein (GFP) on plasmid pMRP9-1. As a prototypic Gram-positive organism,  
97 *Staphylococcus aureus* strain MN8 expressing yellow fluorescent protein (YFP) *via* P<sub>1</sub>-  
98 *yfp*<sub>10B</sub> on plasmid pJY209 was used for all experiments containing *S. aureus*, in  
99 monoculture or in co-culture with *P. aeruginosa* (this plasmid was a gift from Marvin  
100 Whiteley, University of Texas, Austin).

### 101 **Bacterial growth media and culture conditions**

#### 102 **Growth before microscopy**

103 All strains were streaked onto Luria-Bertani (LB) agar plates (Fisher Scientific,  
104 USA) and incubated overnight at 37°C. *P. aeruginosa* and *S. aureus* colonies were

105 inoculated into separate tubes of 4 mL LB broth (Fisher Scientific, USA), and grown  
106 overnight with shaking at 37°C. The optical density (OD) of the overnight cultures was  
107 measured with a spectrophotometer (Genesys, USA). Overnight shaken cultures of *P.*  
108 *aeruginosa* naturally contain both multicellular aggregates and single cells [25], and  
109 aggregates analyzed in the experiments formed spontaneously during overnight growth.

## 110 **Growth under the microscope**

111 For microscopy, the medium used was M9 minimal media (Serva, Germany) with  
112 10% v/v A10 phosphate buffer and a final concentration of 0.3 mM filter-sterilized glucose  
113 (Fisher Scientific, USA). This medium will be referred to as “M9+glucose” in the rest of  
114 this paper. Immediately prior to the start of the flow cell experiment, *P. aeruginosa* and  
115 *S. aureus* cultures were mixed in desired ratios (1:1 if not explicitly stated otherwise) into  
116 10 mL of M9+glucose to achieve the desired combined final OD (0.1 for high-density, 0.01  
117 for medium-density and 0.001 for low-density).

118 For experiments with explicitly-added iron, ferrous sulfate, FeSO<sub>4</sub> (Sigma Aldrich,  
119 USA), was dissolved in distilled water, filter sterilized, and added to M9+glucose for a final  
120 concentration of either 0.05, 5, or 100 μ-molar.

121 For experiments with an iron chelator, a stock solution of de-ferrated ethylene  
122 diamine diorthohydroxyphenyl acetic acid (EDDHA) at a concentration of 50 mg/mL in 1N  
123 NaOH, adjusted to a pH of 9, was prepared and stored at 4°C in plastic tubes (deferrated  
124 EDDHA was a gift from Shelley Payne, University of Texas, Austin). EDDHA primarily  
125 chelates the ferric form of iron, though it can also chelate small amounts of ferrous iron.  
126 EDDHA was added to M9+glucose at a final concentration of 32 μMolar and 320 μMolar,  
127 representing low and high concentration of iron chelator.

## 128 **Flow cell experiments**

129 We used a standard flow cell system as previously described with certain  
130 modifications [22, 26, 27]. A three-chamber flow cell was filled with pre-warmed 37°C  
131 M9+glucose. Pre-warming the media reduces the likelihood of bubbles entering the  
132 sample chamber. Individual flow chambers were inoculated by directly injecting 200-300  
133 μL of bacterial suspension using a 24 gauge needle and 3 mL syringe. The small puncture  
134 in the silicone tubing caused by the injection process was sealed with silicone sealant.  
135 After inoculation, the flow cell was left static (without flow) for 1 hour to allow bacteria to  
136 attach to the coverslip. After that, laminar flow at 3 mL/hour was provided by a peristaltic  
137 pump (Watson-Marlow) for the entire duration of the experiment.

## 138 **Imaging**

139 Biofilms were imaged using an Olympus IX81 inverted confocal microscope  
140 (Olympus, Japan) with a 60x oil-immersion objective. The stage was enclosed by an  
141 incubation chamber heated to 37 °C, which is human physiological temperature. Image  
142 capture was controlled by FV10-ASW version 3.1 software. Areas of interest were  
143 selected by identifying suitable *P. aeruginosa* aggregates paired with regions of *P.*

144 *aeruginosa* single cells that were each  $\sim 500 \mu\text{m}$  away from the corresponding aggregate  
145 (Fig 1). Single-cell regions were displaced from their corresponding aggregate in a  
146 direction perpendicular to the direction of media flow, so that the aggregate and single-  
147 cell region were at the same distance from the media inlet, and therefor were in areas  
148 with approximately the same concentration of growth resources such as carbon source,  
149 oxygen, and iron, and of metabolic byproducts. A displacement of  $\sim 500 \mu\text{m}$  subtends  
150 approximately 10% of the width of the  $\sim 5\text{mm}$  flow channels and is  $\sim 10\times$  greater than  $\sim 10$   
151  $\mu\text{m}$  aggregate diameter. This was chosen to achieve spacing between observed regions  
152 such that the single-cell region was far from, and unperturbed by, the aggregate, but the  
153 perpendicular distance from either region to the wall of the flow cell was not materially  
154 changed, as regions of observations were chosen to be roughly centered on the width of  
155 the flow chamber.

156 **Fig 1. Confocal microscopy reveals the position, density, and (with timelapse**  
157 **microscopy) growth of *P. aeruginosa* single cells and multicellular aggregates and**  
158 ***S. aureus* bacteria.** (A) A 3-D volume of a region seeded with a mixture of *S. aureus*, *P.*  
159 *aeruginosa* single cells, and a *P. aeruginosa* aggregate. *P. aeruginosa* (fluorescent with  
160 mCherry) are shown in red and *S. aureus* (fluorescent with YFP) appear yellow. (B) A  
161 2-D projection of a multicellular *P. aeruginosa* aggregate. (C) Single cells of *P.*  
162 *aeruginosa* at 500  $\mu\text{m}$  distance from the aggregate in panel (B). Single cells are always  
163 examined at a fixed distance of 500  $\mu\text{m}$  from the aggregate to which they are compared,  
164 in a direction perpendicular to the direction in which medium is flowing along the length  
165 of the flow cell. Since the availability of growth substrates such as oxygen decrease with  
166 the direction of flow, comparing the growth of aggregates and single cells at the same  
167 position along the length of the flow cell normalizes for differences in growth rates arising  
168 from different concentrations of growth substrate.

169 An aggregate of *P. aeruginosa* was defined as a clump of at least 10 cells adhering  
170 to each other and extending vertically above the surface of the flow cell. A programmable  
171 motorized stage was used to cycle between multiple locations (typically  $n=5-20$ ) in each  
172 chamber throughout the experiment. At each position of interest, Z-stacks were taken  
173 every 1.5 hours for the first 9 hours of biofilm growth.

## 174 Data Analysis

175 Images were processed using ImageJ (National Institutes of Health, USA). For  
176 coculture experiments, the first step in processing was to account for bleed-through of the  
177 *S. aureus* fluorescence into the *P. aeruginosa* images by subtracting the yellow *S. aureus*  
178 channel from the green or red *P. aeruginosa* channel. Next, images containing  
179 aggregates were cropped manually to separate aggregates and their descendants from  
180 single cells and their descendants. *P. aeruginosa* biomass at time=0 ( $N_0$ ) and time=9 ( $N$ )  
181 hours was then determined by Matlab (MathWorks, USA) using software code that we  
182 wrote for earlier work [22, 27].

183 We then calculated  $N/N_0$  for the *P. aeruginosa* aggregate  $(\frac{N}{N_0})_{aggregate}$  and  $N/N_0$  for  
184 the *P. aeruginosa* single cells  $(\frac{N}{N_0})_{single\ cells}$  for each pair of images. Thus, one aggregate  
185 is associated with one area of single cells  $\sim 500\ \mu\text{m}$  away, and these regions are paired  
186 for analysis. The relative fitness  $f$  was calculated as the ratio  $(\frac{N}{N_0})_{aggregate} / (\frac{N}{N_0})_{single\ cells}$   
187  $= f$ .

188 Thus, a relative fitness greater than one indicates that aggregates are fitter than  
189 single cells, a relative fitness less than one indicates that single cells are fitter than  
190 aggregates, and a relative fitness of one indicates no fitness difference between  
191 aggregates and single cells.

## 192 Statistics

193 We checked for statistically significant differences between two data sets using  
194 the two-tailed Student t-test. For comparison of a data set to unity, we used the one-  
195 sample t-test, where the value for the null hypothesis was 1. We take  $p$ -values  $\leq 0.05$  to  
196 indicate statistical significance, and  $p$ -values are indicated above each bar on plots as  
197 (\*),  $p \leq 0.05$ , (\*\*),  $p \leq 0.01$ , (\*\*\*),  $p \leq 0.001$ , or (ns)  $p > 0.05$ .

## 198 Results

### 199 Co-culture with *S. aureus* increases the fitness of *P.* 200 *aeruginosa* aggregates over *P. aeruginosa* single cells, in a 201 competition-independent way

202 In this subsection, we assess the effect of co-culture with *S. aureus* and the effects  
203 of net cell density on the growth of *P. aeruginosa* aggregates and of *P. aeruginosa* single  
204 cells. For the experiments discussed in this sub-section, the ratio of *P. aeruginosa* to *S.*  
205 *aureus* in the co-culture inocula, as measured by the OD of each culture before mixing,  
206 was held constant at a nominal 1:1. By varying the total cell density (*P. aeruginosa* + *S.*  
207 *aureus*) of the inoculum to correspond to ODs of 0.1 (high), 0.01 (medium) and 0.001  
208 (low), we varied the seeding density of single cells and thus the level of competition for  
209 growth resources on the coverslip surface of the flow cell [22]. We also seeded with  
210 monoculture inocula consisting of *P. aeruginosa* alone at ODs of 0.1 (high), 0.01  
211 (medium) and 0.001 (low), which largely corresponds to the competition measurements  
212 done in our previous work [22]; the primary difference is that, in the present experiments,  
213 the lateral position along the flow cell was kept constant as pairs of aggregates and single-  
214 cell regions were compared.

215 In monoculture, we find that aggregates of *P. aeruginosa* grow better than single  
216 cells of *P. aeruginosa* at high cell density; aggregates grow worse than single cells at low  
217 cell density; growth of aggregates and single cells is comparable at medium cell density.  
218 These finding agrees with our earlier publication showing that *P. aeruginosa* aggregates

219 can have a competition-dependent growth advantage over *P. aeruginosa* single cells [22].  
220 We also find that co-culture with *S. aureus* does not harm the growth of *P. aeruginosa*  
221 (Fig 2). Indeed, co-culture with *S. aureus* slightly benefits *P. aeruginosa* growth, although  
222 in most cases the increase in growth is not statistically significant (Fig 2).

223 **Fig 2. Co-culture with *S. aureus* does not harm the growth of *P. aeruginosa*.** Growth  
224 is measured as biomass after nine hours of growth (N) divided by initial biomass ( $N_0$ ).  
225 Data are paired by monoculture *P. aeruginosa* and *P. aeruginosa* in co-culture with *S.*  
226 *aureus* for each net cell density (OD) examined. P-values compare each pair of bars.  
227 The growth of aggregates (in green) is measured separately from the growth of single  
228 cells. The growth of *P. aeruginosa* aggregates is greater when *S. aureus* is present in  
229 co-culture, but the difference in growth rate is only statistically significant in one case, at  
230 low OD (OD=0.001). The growth of *P. aeruginosa* single cells is marginally greater when  
231 *S. aureus* is present in co-culture, but these differences are not statistically significance.  
232 Error bars are standard error of the mean.

233 However, we find that co-culture with *S. aureus* enhances the growth of *P.*  
234 *aeruginosa* aggregates more than it enhances the growth of single cells. At high and  
235 medium cell density, in co-culture with *S. aureus*, the growth of *P. aeruginosa* aggregates  
236 is greater than the growth of *P. aeruginosa* single cells and these differences are  
237 statistically significant; at low cell density, in co-culture with *S. aureus*, the growth of *P.*  
238 *aeruginosa* aggregates is greater than the growth of *P. aeruginosa* single cells but this  
239 difference is not quite statistically significant (Fig 3). The fitness advantage of aggregates  
240 over single cells is not statistically different for the three cell densities studied, and thus  
241 does not depend on competition (Fig 3). This is strikingly different from our earlier work,  
242 in *P. aeruginosa* monoculture, in which aggregates had a fitness advantage only at high  
243 competition and had a fitness disadvantage at low competition [22].

244 **Fig 3. In co-culture with *S. aureus*, multicellular aggregates of *P. aeruginosa* are**  
245 **fitter than single cells of *P. aeruginosa*.** We quantify the growth advantage of  
246 aggregates using the relative fitness measure defined in Materials and Methods, such  
247 that a relative fitness value  $f > 1$  means that aggregates are fitter than single cells;  $f = 1$ ,  
248 indicating no fitness difference between aggregates and single cells, is indicated with a  
249 dashed line. The average value of the relative fitness is  $1.6 \pm 0.4$  for high cell density (OD  
250 = 0.1),  $2.0 \pm 0.3$  for medium cell density (OD = 0.01), and  $1.8 \pm 0.4$  for low cell density  
251 (OD = 0.001). To determine statistical significance for each density, we used a null  
252 hypothesis that  $f = 1$  – i.e., that aggregates and single cells grow at equal rates (shown  
253 by the dashed line). High- and low-density cases have  $p$ -values of 0.01, indicating  
254 statistical significance. To assess the effect of cell density, i.e. competition, on the relative  
255 fitness of aggregates, we compare the relative fitness of aggregates across each pair of  
256 densities, with a null hypothesis that the  $f$  is the same in all cases; the resulting  $p$ -values,  
257 indicated by dotted lines comparing pairs of conditions, show no significant difference  
258 caused by varying density.

259 Our previous work has shown that under monoculture conditions, *P. aeruginosa*  
260 multicellular aggregates are more fit than corresponding single cells at high levels of  
261 competition for nutrients (where cell density is a proxy for competition) [22]. Thus, our

262 results with coculture could be explained if *S. aureus* were simply a better competitor for  
263 resources than *P. aeruginosa*. To investigate this possibility, we grew *S. aureus* in  
264 monoculture, both as planktonic cells in shaking culture and in the biofilm mode in a flow  
265 cell. We monitored bacterial growth under both conditions. Under planktonic monoculture  
266 conditions, we find that *S. aureus* does not grow well in M9+glucose medium  
267 (Supplementary Fig 1A). This contrasts with monocultures of *P. aeruginosa* grown under  
268 the same conditions, which display typical growth dynamics with entry into the exponential  
269 phase approximately 20-30 hours after inoculation. In flow cells with M9+glucose  
270 medium, *S. aureus* cultures also display poor growth and very little biofilm even after 12  
271 hours of growth (Supplementary Fig 1B). Thus, we conclude that it is unlikely that a  
272 poorly-growing culture of *S. aureus* would be a better competitor for resources than  
273 heartily-growing *P. aeruginosa*, and therefore that the dependence of aggregate relative  
274 fitness on local *S. aureus* does not arise from competition.

275 Thus, we find that co-culture with *S. aureus* increases the relative fitness of  
276 multicellular aggregates of *P. aeruginosa* and erases the dependence of relative fitness  
277 on competition that characterizes the monoculture system.

## 278 **The relative fitness of *P. aeruginosa* aggregates depends on** 279 **the local ratio of *S. aureus* to *P. aeruginosa***

280 To explore the role that *S. aureus* plays in the relative fitness of multicellular  
281 aggregates of *P. aeruginosa*, we varied the initial sample-wide ratio of *S. aureus* to *P.*  
282 *aeruginosa* when combining them prior to inoculation (*P. aeruginosa* < *S. aureus*, *P.*  
283 *aeruginosa* ~ *S. aureus*, and *P. aeruginosa* > *S. aureus*) to a final OD of 0.01. As  
284 measured by OD of the samples pre-mixing, the *P. aeruginosa* < *S. aureus* samples had  
285 *S. aureus* concentration four times that of *P. aeruginosa*, the *P. aeruginosa* > *S. aureus*  
286 samples had *P. aeruginosa* concentration four times that of *S. aureus*, and the *P.*  
287 *aeruginosa* ~ *S. aureus* samples had *P. aeruginosa* concentration the same as that of *S.*  
288 *aureus*. We find that the relative fitness of aggregates does not depend on the sample-  
289 wide ratio of the two species.

290 To assess how the relative fitness of *P. aeruginosa* aggregates depends on the  
291 local concentration of *S. aureus*, for each field of view (roughly 250  $\mu\text{m}$  x 250  $\mu\text{m}$ ), we  
292 measured the initial *S. aureus* biomass and the initial *P. aeruginosa* biomass to determine  
293 the initial local ratio of *S. aureus* to *P. aeruginosa*; only single cells in the fields of view  
294 were used for these measurements. We then binned the resulting relative fitness of *P.*  
295 *aeruginosa* aggregates according to the initial local ratio of *S. aureus* to *P. aeruginosa*,  
296 with bins as follows: *P. aeruginosa* : *S. aureus* < 1; 1 < *P. aeruginosa* : *S. aureus* < 10; *P.*  
297 *aeruginosa* : *S. aureus* > 10 (Fig 4). We find that when initial local concentrations of *S.*  
298 *aureus* > *P. aeruginosa*, the average relative fitness of aggregates is  $2.5 \pm 0.4$ . When the  
299 initial local concentrations are such that *S. aureus* ~ *P. aeruginosa*, the average relative  
300 fitness is  $1.8 \pm 0.3$ . These values for relative advantage are both statistically significant.  
301 When the initial concentrations of *S. aureus* < *P. aeruginosa* (*i.e.* when approaching a  
302 monoculture of *P. aeruginosa*) there is no statistically-significant relative fitness  
303 advantage for aggregates. Thus, we find that the relative fitness of *P. aeruginosa*



304 multicellular aggregates depends on the initial **local** ratio of the two species, increasing  
305 as the local population contains a higher proportion of *S. aureus* than *P. aeruginosa*.

306 **Fig 4. The growth advantage of *P. aeruginosa* aggregates increases when *S. aureus***  
307 **single cells locally outnumber *P. aeruginosa* single cells.** The relative fitness for  
308 aggregates increases as the initial local ratio of *S. aureus* to *P. aeruginosa* increases. For  
309 each condition, *p*-values were calculated for the null hypothesis that relative fitness  $f = 1$ ,  
310 and are indicated on each bar.

311 If *S. aureus* were producing a factor harmful to *P. aeruginosa*, from which  
312 aggregates are better-protected than single cells, we would expect *P. aeruginosa* growth  
313 in co-culture to be slower than growth in monoculture. On the contrary, we find that *P.*  
314 *aeruginosa* in co-culture grows as fast or faster than *P. aeruginosa* in monoculture, for all  
315 cases examined (Fig 2).

316 Thus, our results indicate that *P. aeruginosa* aggregates are able to better obtain  
317 some benefit from *S. aureus* than are *P. aeruginosa* single cells, and that the benefit  
318 obtained depends on the **local** concentration of *S. aureus*. Because the intrinsic  
319 disadvantage of aggregates that we found in our earlier work, namely that cells in the  
320 aggregate interiors have very limited access to growth substrate and therefore grow very  
321 slowly [22], should still be present in this system, we infer that the benefit obtained from  
322 *S. aureus* by aggregates is sufficient to overcome this advantage.

## 323 **The extracellular polysaccharide Psl is linked to the growth** 324 **advantage of *P. aeruginosa* aggregates**

325 Cells in aggregates are bound together by a matrix dominated by extracellular  
326 polysaccharides (EPS). Thus, bacteria in aggregates experience a higher local  
327 concentration of EPS than do their single-cell counterparts. *In vitro*, the PAO1 lab strain  
328 of *P. aeruginosa* makes two types of EPS, Psl and Pel, but Psl is the most dominant [24,  
329 28]. In microscopy observations of a Psl over-expressing strain ( $\Delta wspF \Delta pel$ ) and a Pel  
330 over-expressing strain ( $\Delta wspF \Delta psl$ ), we find that shaken liquid cultures of Psl over-  
331 expressors than do more and larger aggregates than do wild-type (WT) cultures, whereas  
332 shaken liquid cultures of Pel over-expressors have fewer and smaller aggregates than do  
333 WT cultures. Therefore, we conclude that Psl is the most important EPS factor for causing  
334 *P. aeruginosa* to aggregate.

335 To investigate the role that Psl may play in the relative fitness of *P. aeruginosa*  
336 aggregates and single cells, we performed flow cell coculture experiments with a strain,  
337 PAO1  $\Delta pel$ , which does not produce the EPS Pel. Because there is overlap in the  
338 substrates and cellular machinery used for Pel and Psl production [29], we expect that  
339  $\Delta pel$  should make more Psl than the wild-type (WT); this is supported by our earlier study  
340 (Fig 6 in [28]). For  $\Delta pel$  aggregates compared with  $\Delta pel$  single cells, we found a relative  
341 fitness of  $0.6 \pm 0.15$  for medium initial density (OD~0.01). Thus, the relative fitness found  
342 for WT aggregates vanishes and  $\Delta pel$  aggregates are *less* fit than  $\Delta pel$  single cells. This

343 is true even when the data are analyzed as a function of the local ratios of *P. aeruginosa*  
344 and *S. aureus*.

345 Such a change in relative fitness could arise from an increase in the fitness of the  
346 single cells or from a decrease in the fitness of the aggregates. To assess which is  
347 occurring here, we measured the absolute fitness ( $N/N_0$ ) of single cells and aggregates,  
348 for both WT and  $\Delta pel$ . We find that  $N/N_0$  is greater for  $\Delta pel$  than for WT for both  
349 aggregates and single cells (Fig 5); thus, both aggregates and single cells have increased  
350 fitness with increased Psl production. However, the aggregates are 56% fitter with  
351 increased Psl while the single cells are 278% fitter with increased Psl. This indicates that  
352 the growth advantage of aggregates does not arise from their high density of bacteria, but  
353 rather their high Psl content. When single cells express high levels of Psl, they accrue  
354 more of the benefits associated with Psl without the disadvantages of being in an  
355 aggregate, namely limited access to growth resources in the aggregate interior.

356 **Fig 5. Increased production of Psl ( $\Delta pel$  over-expresses Psl, labeled in figure as**  
357 **Psl+) increases the fitness of both aggregates and single cells in co-culture with *S.***  
358 ***aureus*.** However, the increase in fitness is greater for single cells than for aggregates –  
359 aggregate fitness increases by 56% better, whereas single cell fitnesses increases by  
360 278%. p-values comparing each pair of bars (indicated by dotted lines) are calculated for  
361 the null hypothesis that the relative fitness  $f$  for the paired data are the same.

362 Thus, the ability to benefit from *S. aureus* that are nearby in space is also  
363 associated with a spatially-localized property, the amount of Psl near cells.

## 364 **The relative fitness of aggregates in co-culture is linked to low** 365 **iron content in the environment**

366 Iron is an essential micronutrient for growth of *P. aeruginosa* [30, 31]. All the flow  
367 cell experiments presented above were done in M9+glucose, without added iron. Thus,  
368 any iron present is an impurity carried over from the rich overnight culture media in which  
369 both bacterial species grew. Visaggio *et al.* recently found that multicellular aggregates  
370 of *P. aeruginosa* promote pyoverdine-dependent iron uptake into bacterial cells [32]. Yu  
371 *et al.* recently found that Psl, which is the primary extracellular polysaccharide promoting  
372 aggregation, can bind to and store iron [21]. Thus, there is a link between iron acquisition  
373 and both the formation of aggregates and the production of Psl. Recent work has shown  
374 that Psl remains closely associated with the cells that produce it [33]. Therefore, we  
375 hypothesize that Psl-bound iron may stay with the Psl producer and be more easily  
376 acquired and used by that bacterial cell or aggregate.

377 To determine the effect of sample-wide iron concentration on the relative fitness of  
378 *P. aeruginosa* aggregates in co-culture, we performed a series of experiments in which  
379 we added iron, in the form of  $FeSO_4$ , to the experimental media in three different  
380 concentrations: 0.05, 5 and 100  $\mu$ -molar. In each experiment we used a medium initial  
381 density of cells (OD~0.01). Compared with no added iron, we find that the relative fitness  
382 of aggregates increases when a moderate (5  $\mu$ -molar) concentration of iron is added, and

383 increases even more when a low (0.05  $\mu$ -molar) concentration of iron is added; at high  
384 concentrations of added iron (100  $\mu$ -molar), aggregates and single cells are equally fit  
385 (Fig 6). This suggests that when iron is a scarce resource, aggregates are better able to  
386 acquire iron and grow than are single cells, but when iron is abundant this advantage is  
387 no longer important.

388 **Fig 6. In co-culture with *S. aureus*, the growth advantage of *P. aeruginosa***  
389 **aggregates over *P. aeruginosa* single cells is modulated by iron content in the**  
390 **growth medium.** *p*-values for each single bar are calculated for the null hypothesis that  
391 the relative fitness  $f=1$ ; this is the value indicated by the dashed line and corresponds to  
392 no fitness difference between aggregates and single cells. *p*-values comparing each pair  
393 of bars (indicated by dotted lines) are calculated for the null hypothesis that the relative  
394 fitness  $f$  for the paired data are the same. These indicate that the differences in relative  
395 fitness seen when comparing high-iron conditions with the other conditions tested are  
396 statistically significant or, in the case of high *versus* medium added iron, nearly so.

## 397 **Reducing iron availability with iron chelator complex** 398 **increases the relative fitness of aggregates**

399 As another approach to evaluating the importance of iron availability to the relative  
400 fitness of aggregates in co-culture, we added an iron chelator, to M9+glucose without  
401 explicitly-added iron. EDDHA primarily chelates the ferric form of iron, though it can also  
402 chelate small amounts of ferrous iron. By chelation, EDDHA effectively reduces the  
403 concentration of iron available to bacteria. Experiments were done at high and medium  
404 initial sample-wide cell density (OD~0.1 and ~0.01) with equal amounts of *P. aeruginosa*  
405 and *S. aureus* (1:1 as measured by OD). We used two different concentrations of EDDHA  
406 – low (32  $\mu$ -molar) and high (320  $\mu$ -molar). For both initial cell densities and both  
407 concentrations of chelator, we find that aggregates are fitter than single cells (Fig 7). At  
408 low chelator concentration, the relative fitness of aggregates is comparable to that with  
409 no chelator present (Fig 2). At high chelator concentration, aggregate advantage over  
410 single cells increased by ~90% for high inoculation density, and by ~30% for medium  
411 inoculation density (Fig 7).

412 **Fig 7. When grown in the presence of high concentrations of iron chelator, the**  
413 **fitness advantage of aggregates increases.** *P*-values shown above single bars were  
414 computed using the null hypothesis that the relative fitness  $f=1$ , meaning no fitness  
415 difference between aggregates and single cells. *p*-values comparing relative fitness under  
416 two different conditions are shown above a dotted line indicating the two values being  
417 compared, and were computed using the null hypothesis that the relative fitness is the  
418 same under both conditions.

419 Increasing iron chelator is equivalent to decreasing the available iron. Thus, these  
420 findings are consistent with aggregates being better able to acquire and use iron for  
421 growth when iron is a scarce resource, as we also inferred from the data shown in Fig 6  
422 in the previous subsection. To probe this more deeply, we examine the absolute fitness  
423  $N/N_0$  changes with iron availability. At high chelator concentration, average  $N/N_0$  for

424 single cells was ~1.1 for high inoculation density and ~2.2 for medium inoculation density;  
425 for aggregates, average  $N/N_0$  was ~3.2 for high inoculation density and ~4.7 for medium  
426 inoculation density. Thus, both aggregates and single cells grow more slowly under  
427 conditions of high chelator concentration and therefore low iron availability. However,  
428 comparing growth under high and low chelator concentration shows that the absolute  
429 fitness of single cells is reduced by ~65% when chelator concentration is reduced and the  
430 absolute growth of aggregates is reduced by only ~45%. This is the origin of the increase  
431 in the relative fitness of aggregates with higher chelator concentration (and therefore  
432 lower iron availability). That the absolute fitness of both aggregates and single cells  
433 increases with decreasing inoculation density is consistent with our earlier work showing  
434 that higher competition for growth resources reduces the rate of growth for all bacteria  
435 [22].

### 436 ***P. aeruginosa* aggregates do not impair *S. aureus* growth** 437 **more than do *P. aeruginosa* single cells**

438 Others have shown that aggregation of *P. aeruginosa* leads to increased  
439 production of virulence factors by the multicellular aggregate and to quorum sensing that  
440 is linked to virulence [25, 32]. These virulence factors are diffusible and allow *P.*  
441 *aeruginosa* to lyse *S. aureus* for use as an iron source [31, 34]. Therefore, it is plausible  
442 that the relative fitness advantage of aggregates could arise, at least in part, from  
443 aggregates producing more virulence factors than single cells.

444 To evaluate whether *P. aeruginosa* aggregates are associated with increased lysis  
445 of *S. aureus* in the local vicinity, we examined how fitness of *S. aureus* depends on its  
446 proximity to a multicellular aggregate of *P. aeruginosa*. This analysis is conceptually  
447 similar to the analysis done to determine the relative fitness of *P. aeruginosa* aggregates  
448 with respect to *P. aeruginosa* single cells. We calculated the fractional increase in *S.*  
449 *aureus* biomass  $N_{Staph}/N_{Staph_0}$  for *S. aureus* near the *P. aeruginosa* aggregates  
450  $\left(\frac{N_{Staph}}{N_{Staph_0}}\right)_{aggregate}$  and ~500  $\mu\text{m}$  away  $\left(\frac{N_{Staph}}{N_{Staph_0}}\right)_{single\ cells}$ . The relative fitness  $f_{Staph}$  was  
451 calculated as the ratio  $\left(\frac{N_{Staph}}{N_{Staph_0}}\right)_{aggregate} / \left(\frac{N_{Staph}}{N_{Staph_0}}\right)_{single\ cells} = f_{Staph}$ .

452 Surprisingly, we found that *S. aureus* fitness is unchanged by proximity to an  
453 aggregate of *P. aeruginosa* (Fig 8). This was true for all initial cell densities, and all initial  
454 ratios of the two species, except at moderate inoculation density where the *S. aureus*  
455 fitness is actually higher next to a *P. aeruginosa* aggregate. These results imply that  
456 multicellular aggregates do not have an advantage in lysing nearby *S. aureus* and thereby  
457 releasing iron.

458 **Fig 8. The fitness of *S. aureus* cells near a *P. aeruginosa* aggregate, compared with**  
459 ***S. aureus* cells far from an aggregate (but near *P. aeruginosa* single cells) is not**  
460 **significantly impacted by the inoculation density or by the local ratio of the two species.**  
461 **P-values were calculated for the null hypothesis that relative fitness of *S. aureus* is 1, and**  
462 **are indicated above each bar.**

463 Since killing of *S. aureus* by *P. aeruginosa* does not appear linked to the relative  
464 fitness of *P. aeruginosa* aggregates, we also investigated whether the benefit provided  
465 by *S. aureus* requires living activity on the part of *S. aureus*. For this, we killed *S. aureus*  
466 using heat and then inoculated, imaged, and measured the relative fitness of *P.*  
467 *aeruginosa* aggregates as before. Under these conditions, the relative fitness of *P.*  
468 *aeruginosa* is reduced and is no longer statistically significant (Fig 9) This suggests that  
469 active production and release of a factor by *S. aureus* is important for conferring a fitness  
470 advantage to *P. aeruginosa* aggregates [35-37].

471 **Figure 9. The fitness advantage of *P. aeruginosa* aggregates is reduced when *S.***  
472 ***aureus* has been heat-killed before inoculation.** P-values are calculated using the null  
473 hypothesis that aggregates grow at the same rate as *P. aeruginosa* single cells. When  
474 all the *S. aureus* present have previously been heat-killed, the growth of aggregates is no  
475 longer statistically-significantly different from that of single cells, and the impact of local  
476 ratio of *P. aeruginosa* to *S. aureus* is no longer seen.

## 477 Discussion

### 478 Hypothesis: The *P. aeruginosa* EPS Psl binds siderophores 479 produced by *S. aureus*

480 Thus, we conclude that *P. aeruginosa* aggregates are better able than *P.*  
481 *aeruginosa* single cells to utilize a benefit that matters when the availability of iron is low,  
482 that originates from *S. aureus*, and that increases with the local density of *S. aureus*.  
483 However, the disproportionate benefit to aggregates is not due to aggregates being more  
484 adept at killing nearby *S. aureus*, and likely requires the production of an active factor by  
485 *S. aureus*. *S. aureus* is known to produce siderophores that bind iron [35-37]. Therefore,  
486 we hypothesize that *P. aeruginosa* aggregates are better able to acquire iron from *S.*  
487 *aureus* siderophores than are *P. aeruginosa* single cells, and that this may be linked to  
488 the ability of the EPS Psl to bind iron. This hypothesis will be the subject of future  
489 investigation, with further considerations described below.

### 490 Types of iron available

491 The growth advantage of *P. aeruginosa* aggregates over *P. aeruginosa* single cells  
492 is linked to low availability of iron in the environment. FeSO<sub>4</sub> adds the ferrous form of iron  
493 (iron II), which is soluble in water. However, at moderate and high levels of added iron,  
494 there is obvious precipitate in the experimental media. Iron II is spontaneously oxidized  
495 to iron III (ferric form) by reacting with molecular oxygen (present in aqueous media).  
496 Ferric iron is insoluble in water and likely causes the precipitates we observe. Therefore,  
497 the growing biofilm probably has access to a mixture of soluble iron II (ferrous form) and  
498 small quantities of insoluble iron III (ferric form). *P. aeruginosa* has different strategies  
499 for acquiring different forms of iron: it uses the Feo system to uptake soluble ferrous iron  
500 [38], and it uses siderophores to uptake ferric iron [39]. Both systems could be in use in  
501 these experiments. Future work could distinguish Psl binding directly to iron from the

502 benefits conferred by *S. aureus* siderophores by using *S. aureus* siderophore mutants or  
503 staphyloferrin.

## 504 **Relative fitness likely results from an interplay between aggregate** 505 **structure and Psl content**

506 The finding that increased Psl production benefits single cells more than  
507 aggregates (Fig 5) likely arises from the intrinsic structural disadvantage of aggregates,  
508 namely that cells in the interior grow slowly because they have limited access to growth  
509 substrate [22]. Single cells do not have this disadvantage.

## 510 **Implications for the evolutionary development of biofilms**

511 Iron scarcity and the presence of multiple species are widespread characteristics  
512 of the natural environments in which *P. aeruginosa* evolved. The work we present here  
513 suggests that the iron-binding properties of Psl may have provided a selective advantage  
514 that also led to greater tendencies to aggregation. Such aggregative tendencies could  
515 also have promoted the development of additional group benefits associated with *P.*  
516 *aeruginosa* aggregates and biofilms [25]. Because we find that the iron-associated growth  
517 benefit for aggregates does not depend on the density of *P. aeruginosa* competitors for  
518 growth resources, there is no reason to believe that spatial structure is a major driver for  
519 this interaction. This is strikingly unlike our earlier finding for *P. aeruginosa* monoculture,  
520 in which competition and the spatial structure of both aggregates and the environment  
521 are essential to the growth advantage for aggregates [22]. Releasing the requirement for  
522 spatial structure greatly broadens the range of natural scenarios in which the aggregate  
523 growth advantage could provide a selective advantage on which evolution might act.

## 524 **Implications for biofilm disease**

525 In addition to being a more realistic representation of natural environments,  
526 polymicrobial systems account for most pathogenic infections [40-44]. *P. aeruginosa* and  
527 *Staphylococcus aureus* are widespread co-pathogens in wounds, catheters, implants,  
528 and in the cystic fibrosis lung [45-57]. Interspecies interactions, including those between  
529 *P. aeruginosa* and *S. aureus*, can strongly impact clinical outcomes [45, 48, 58-67].  
530 Therefore, better understanding of the ecology of *P. aeruginosa* + *S. aureus* systems is  
531 likely to lead to better treatments of polymicrobial infections.

532 For instance, our work suggests that high Psl production could contribute to fitness  
533 by promoting iron acquisition. This might contribute to the evolutionary trend toward  
534 higher Psl production that is recently being recognized for chronic infections in cystic  
535 fibrosis [68-71]. We have recently suggested that Psl may confer a mechanical fitness  
536 benefit on biofilm infections, by increasing their elasticity, yield stress, and toughness,  
537 and perhaps thereby hindering breakup by phagocytosing neutrophils [28]. Better iron  
538 acquisition would be a chemical and metabolic advantage of Psl production that  
539 complements and is orthogonal to its effects in increasing mechanical robustness.

## 540 Conclusion

541 Our results show that aggregates of *P. aeruginosa* can have a growth advantage  
542 over single cells in environments with limited iron. This growth advantage is linked to Psl,  
543 the dominant cohesive EPS component of PA01 aggregates; when single cells over-  
544 express Psl, their growth becomes comparable to that of aggregates. Based on the  
545 recent work of others [21], we suggest that this is likely because Psl recruits iron so that  
546 cells embedded in high-Psl environments experience a resulting enrichment of  
547 environmental iron as well.

## 548 Acknowledgements

549 This work was funded by: grants from the Human Frontier Science Program (HFSP-  
550 RGY0081/2012 – GORDON), the Cystic Fibrosis Foundation (Gordon 201602808-001),  
551 the National Science Foundation (727544, BMMB, CMMI), and the National Institutes of  
552 Health (1R01AI121500-01A1, NIAID), all to Vernita Gordon; a gift from ExxonMobil;  
553 startup funds from The University of Texas at Austin. Professor Shelley Payne (The  
554 University of Texas at Austin) gave us deferrated EDDHA and read and commented on  
555 the manuscript before submission. Professor Marvin Whiteley (The University of Texas  
556 at Austin) gave us the plasmid pJY209.

## 557 References

- 558 1. Flemming H-C, Wingender J. The biofilm matrix. *Nature Reviews Microbiology*.  
559 2010;8:623-33.
- 560 2. Branda S, Vik A, Friedman L, Kolter R. Biofilms: the matrix revisited. *Trends in*  
561 *Microbiology*. 2005;13:20-5.
- 562 3. Sutherland I. The biofilm matrix - an immobilized but dynamic microbial  
563 environment. *Trends in Microbiology*. 2001;9:222-7.
- 564 4. Karatan E, Watnick P. Signals, regulatory networks, and materials tha build and  
565 break bacterial biofilms. *Microbiology and Molecular Biology Reviews*. 2009;73:310-47.
- 566 5. Arciola CR, Campoccia D, Montanaro L. Implant infections: adhesion, biofilm  
567 formation and immune evasion. *Nature Reviews Microbiology*. 2018;16:397-409.
- 568 6. Gonzalez JF, Hahn MM, Gunn JS. Chronic biofilm-based infections: skewing of  
569 the immune response. *Pathog6ens and Disease*. 2018;76(3). doi: doi:  
570 10.1093/femspd/fty023.
- 571 7. Maurice NM, Bedi B, Sadikot RT. *Pseudomonas aeruginosa* Biofilms: Host  
572 Response and Clinical Implications in Lung Infections. *American Journal of Respiratory*  
573 *Cell and Molecular Biology*. 2018;58(4):428-39.

- 574 8. Sonderholm M, Bjarnsholt T, Alhede M, Kolpen M, Jensen PO, Kuhl M, et al. The  
575 Consequences of Being in an Infectious Biofilm: Microenvironmental Conditions  
576 Governing Antibiotic Tolerance. *International Journal of Molecular Sciences*.  
577 2017;18(12):2688.
- 578 9. Malone M, Bjarnsholt T, McBain A, Games G, Stoodley P, Leaper D, et al. The  
579 prevalence of biofilms in chronic wounds: a systematic review and meta-analysis of  
580 published data. *Journal of Wound Care*. 2017;26(1). doi: 10.12968/jowc.2017.26.1.20.
- 581 10. Dibartola AC, Swearingen MC, Granger JF, Stoodley P, Dusane DH. Biofilms in  
582 orthopedic infections: a review of laboratory methods. *Journal of Pathology, Microbiology  
583 and Immunology*. 2017;125(4):418-28.
- 584 11. Conen A, Fux CA, Vajkoczy P, Trampuz A. Management of infections associated  
585 with neurosurgical implanted devices. *Expert Review of Anti-infective Therapy*.  
586 2016;15(3). doi: 10.1080/14787210.2017.1267563.
- 587 12. Streeter K, Katouli M. *Pseudomonas aeruginosa*: A review of their Pathogenesis  
588 and Prevalence in Clinical Settings and the Environment. *Infection, Epidemiology &  
589 Microbiology*. 2016;2(1):25-32.
- 590 13. Liu H, Carvalhais LC, Crawford M, Singh E, Dennis PG, Pieterse CM, et al. Inner  
591 Plant Values: Diversity, Colonization and Benefits from Endophytic Bacteria. *Frontiers in  
592 Microbiology*. 2017;8:2552. doi: 10.3389/fmicb.2017.02552.
- 593 14. Hacquard S, Spaepen S, Garrido-Oter R, Schulze-Lefert P. Interplay Between  
594 Innate Immunity and the Plant Microbiota. *Annual Review of Phytopathology*.  
595 2017;55:565-89.
- 596 15. Kumar A, Verma JP. Does plant—Microbe interaction confer stress tolerance in  
597 plants: A review? *Microbiological Research*. 2018;207:41-52.
- 598 16. Hense BA, Kuttler C, Muller J, Rothballer M, Hartmann A, Kreft J-U. Does  
599 efficiency sensing unify diffusion and quorum sensing? *Nature Reviews Microbiology*.  
600 2007;5:230-9.
- 601 17. Flemming H-C, Wingender J, Szewzyk U, Steinberg P, Rice SA, Kjelleberg S.  
602 Biofilms: an emergent form of bacterial life. *Nature Reviews Microbiology*. 2016;14:563-  
603 75.
- 604 18. Friman V-P, Buckling A. Effects of predation on real-time host–parasite  
605 coevolutionary dynamics. *Ecology Letters*. 2013;16(1):39-46.
- 606 19. McNally L, Brown SP. Building the microbiome in health and disease: niche  
607 construction and social conflict in bacteria. *Philosophical Transactions of the Royal  
608 Society B*. 2015;370(1675):20140298. doi: 10.1098/rstb.2014.0298.



- 609 20. Friman V-P, Diggle SP, Buckling A. Protist predation can favour cooperation within  
610 bacterial species. *Biology Letters*. 2013;9(5):20130548. doi: 10.1098/rsbl.2013.0548.
- 611 21. Yu S, Wei Q, Zhao T, Guo Y, Ma L. A Survival Strategy for *Pseudomonas*  
612 *aeruginosa* That Uses Exopolysaccharides To Sequester and Store Iron To Stimulate  
613 Psl-Dependent Biofilm Formation. *Applied and Environmental Microbiology*.  
614 2016;82:6403-13.
- 615 22. Kragh K, Hutchison J, Melaugh G, Rodesney C, Roberts A, Irie Y, et al. Role of  
616 multicellular aggregates in biofilm formation. *mBio*. 2016;7:e00237-16.
- 617 23. Jacobs M, Alwood A, Thaipisuttikul I, Spencer D, Hougen E, Ernst S, et al.  
618 Comprehensive transposon mutant library of *Pseudomonas aeruginosa*. *Proceedings of*  
619 *the National Academy of Sciences of the USA*. 2003;100:14339–44.
- 620 24. Colvin KM, Gordon VD, Murakami K, Borlee BR, Wozniak DJ, Wong GC, et al. The  
621 Pel Polysaccharide Can Serve a Structural and Protective Role in the Biofilm Matrix of  
622 *Pseudomonas aeruginosa*. *PLoS Pathogens*. 2011;7(1):e1001264.
- 623 25. Alhede M, Kragh K, Qvortrup K, Allesen-Holm M, van Gennip M, Christensen L, et  
624 al. Phenotypes of non-attached *Pseudomonas aeruginosa* aggregates resemble surface  
625 attached biofilm. *PLoS ONE*. 2011;6:e27943.
- 626 26. Sternberg C, Tolker-Nielsen T. Growing and analyzing biofilms in flow cells.  
627 *Current Protocols in Microbiology*. 2006:00:B:1B.2:1B.2.1–1B.2.15.
- 628 27. Hutchison J, Rodesney C, Kaushik K, Le H, Hurwitz D, Irie Y, et al. Single-Cell  
629 Control of Initial Spatial Structure in Biofilm Development Using Laser Trapping.  
630 *Langmuir*. 2014;30:4522–30.
- 631 28. Kovach K, Davis-Fields M, Irie Y, Jain K, Doorwar S, Vuong K, et al. Evolutionary  
632 adaptations of biofilms infecting cystic fibrosis lungs promote mechanical toughness by  
633 adjusting polysaccharide production. *npj Biofilms and Microbiomes*. 2017;3(1):1.
- 634 29. Franklin M, Nivens D, Weadge J, Howell P. Biosynthesis of the *Pseudomonas*  
635 *aeruginosa* Extracellular Polysaccharides, Alginate, Pel, and Psl. *Frontiers in*  
636 *Microbiology*. 2011;2:167. doi: doi: 10.3389/fmicb.2011.00167.
- 637 30. Banin E, Vasil M, Greenberg E. Iron and *Pseudomonas aeruginosa* biofilm  
638 formation. *Proceedings of the National Academy of Sciences of the USA*.  
639 2005;102:11076-81.
- 640 31. Mashburn L, Jett A, Akins D, Whiteley M. *Staphylococcus aureus* Serves as an  
641 Iron Source for *Pseudomonas aeruginosa* during *In Vivo* Coculture. *Journal of*  
642 *Bacteriology*. 2005;187:554-66.

- 643 32. Visaggio D, Pasqua M, Bonchi C, Kaefer V, Visca P, Imperi F. Cell aggregation  
644 promotes pyoverdine-dependent iron uptake and virulence in *Pseudomonas aeruginosa*.  
645 *Frontiers in Microbiology*. 2015;6:902.
- 646 33. Irie Y, Roberts A, Kragh K, Gordon V, Hutchison J, Allen R, et al. The  
647 *Pseudomonas aeruginosa* PSL polysaccharide is a social but non-cheatable trait in  
648 biofilms. *BioRxiv*, submitted to *mBio*. 2016;doi: <https://doi.org/10.1101/049783>. doi:  
649 <http://dx.doi.org/10.1101/049783>.
- 650 34. Korgaonkar A, Trivedi U, Rumbaugh K, Whiteley M. Community surveillance  
651 enhances *Pseudomonas aeruginosa* virulence during polymicrobial infection.  
652 *Proceedings of the National Academy of Sciences of the USA*. 2013;110:1059-64.
- 653 35. Dale S, Doherty-Kirby A, Lajoie G, Heinrichs D. Role of Siderophore Biosynthesis  
654 in Virulence of *Staphylococcus aureus*: Identification and Characterization of Genes  
655 Involved in Production of a Siderophore. *Infection and Immunity*. 2004;72:29-37.
- 656 36. Hammer N, Skaar E. Molecular mechanisms of *Staphylococcus aureus* iron  
657 acquisition. *Annual Reviews of Microbiology*. 2011;65:129-47.
- 658 37. Harrison F, Paul J, Massey R, Nuckling A. Interspecific competition and  
659 siderophore-mediated cooperation in *Pseudomonas aeruginosa*. *The ISME Journal*.  
660 2008;2:49-55.
- 661 38. Cartron M, Maddocks S, Gillingham P, Craven C, Andrews S. Feo – Transport of  
662 Ferrous Iron into Bacteria. *Biometals*. 2006;19:143-57.
- 663 39. Nguyen A, O'Neill M, Watts A, Robson C, Lamont I, Wilks A, et al. Adaptation of  
664 Iron Homeostasis Pathways by a *Pseudomonas aeruginosa* Pyoverdine Mutant in the  
665 Cystic Fibrosis Lung. *Journal of Bacteriology*. 2014;196:2265-76.
- 666 40. Hall-Stoodley L, Stoodley P. Biofilm formation and dispersal and the transmission  
667 of human pathogens. *Trends in Microbiology*. 2005;13:7-10.
- 668 41. Lyons M, Ward J, Gaff H, Drake J, Dobbs F. Theory of island biogeography on a  
669 microscopic scale: organic aggregates as islands for aquatic pathogens. *Aquatic*  
670 *Microbial Ecology*. 2010;60:1-13.
- 671 42. Stoodley P, Wilson S, Hall-Stoodley L, Boyle J, Lappin-Scott H, Costerton J.  
672 Growth and detachment of cell clusters from mature mixed-species biofilms. *Applied and*  
673 *Environmental Microbiology*. 2001;67:5608-13.
- 674 43. Yildiz F. Processes controlling the transmission of bacterial pathogens in the  
675 environment. *Research in Microbiology*. 2007;158:195-202.
- 676 44. Scales B, Huffnagle G. The microbiome in wound repair and tissue fibrosis. *Journal*  
677 *of Pathology*. 2012;229:323-31.

- 678 45. Hendricks K, Burd T, Anglen J, Simpson A, Christensen G, Gainor B. Synergy  
679 between *Staphylococcus aureus* and *Pseudomonas aeruginosa* in a rat model of complex  
680 orthopaedic wounds. *Journal of Bone and Joint Surgery American volume*. 2001;83:855-  
681 61.
- 682 46. Erb-Downward J, Thompson D, Han M, Freeman C, McCloskey L, Schmidt L, et  
683 al. Analysis of the lung microbiome in the "healthy" smoker and in COPD. *PLoS ONE*.  
684 2011;6:e16384.
- 685 47. Willner D, Haynes M, Furlan M, Schmieder R, Lim Y, Rainey P, et al. Spatial  
686 distribution of microbial communities in the cystic fibrosis lung. *ISME J*. 2012;6:471-4.
- 687 48. Peters B, Jabra-Rizk M, O'May G, Costerton J, Shirtliff M. Polymicrobial  
688 interactions: impact on pathogenesis and human disease. *Clinical Microbiology Reviews*.  
689 2012;25:193-213.
- 690 49. Mitchell G, Malouin F. Outcome and prevention of *Pseudomonas aeruginosa* -  
691 *Staphylococcus aureus* interactions during pulmonary infections in cystic fibrosis. In:  
692 Sriramulu D, editor. *Cystic Fibrosis - Renewed hopes through research*. Rijeka, Croatia:  
693 InTech; 2012.
- 694 50. Sibley C, Surette M. The polymicrobial nature of airway infections in cystic fibrosis:  
695 Cangen Gold Medal Lecture. *Canadian Journal of Microbiology*. 2011;57:69-77.
- 696 51. Gilchrist F, Salamat S, Clayton S, Peach J, Alexander J, Lenney W.  
697 Bronchoalveolar lavage in children with cystic fibrosis: how many lobes should be  
698 sampled? *Archives of disease in childhood*. 2011;96:215-7.
- 699 52. Gutierrez J, Grimwood K, Armstrong D, Carlin J, Carzino R, Olinsky A, et al.  
700 Interlobar differences in bronchoalveolar lavage fluid from children with cystic fibrosis.  
701 *European Respiratory Journal*. 2001;17:281-6.
- 702 53. Smith D, Smith E, Pitt T, Stableforth D. Regional microbiology of the cystic fibrosis  
703 lung: a post-mortem study in adults. *Journal of Infection*. 1998;37:41-3.
- 704 54. Rudkjobing V, Thomsen T, Alhede M, Kragh K, Nielsen P, Johansen U, et al. The  
705 microorganisms in chronically infected end-stage and non-end-stage cystic fibrosis  
706 patients. *FEMS Immunology & Medical Microbiology*. 2012;65:236-44.
- 707 55. Fazli M, Bjarnsholt T, Kirketerp-Moller K, Jorgensen B, Andersen A, Kroghfelt K, et  
708 al. Nonrandom distribution of *Pseudomonas aeruginosa* and *Staphylococcus aureus* in  
709 chronic wounds. *Journal of Clinical Microbiology*. 2009;47:4084-9.
- 710 56. Yang L, Hengzhuang W, Wu H, Damkiaer S, Jochumsen N, Song Z, et al.  
711 Polysaccharides serve as scaffolds of biofilms formed by mucoid *Pseudomonas*  
712 *aeruginosa*. *FEMS Immunology & Medical Microbiology*. 2012;65:366-76.

- 713 57. Yang L, Liu Y, Markussen T, Hoiby N, Tolker-Nielsen T, Molin S. Pattern  
714 differentiation in co-culture biofilms formed by *Staphylococcus aureus* and *Pseudomonas*  
715 *aeruginosa*. *FEMS Immunology & Medical Microbiology*. 2011;62:339-47.
- 716 58. Zhang W, Sileika T, Packman A. Effects of fluid flow conditions on interactions  
717 between species in biofilms. *FEMS Microbiology Ecology*. 2013;84:344-54.
- 718 59. Dalton T, Dowd S, Wolcott R, Sun Y, Watters C, Griswold J, et al. An In Vivo  
719 Polymicrobial Biofilm Wound Infection Model to Study Interspecies Interactions. *PLoS*  
720 *ONE*. 2011;6:e27317.
- 721 60. Grice E, Segre J. The skin microbiome. *Nature Reviews Microbiology*. 2011;9:244-  
722 53.
- 723 61. Bjornson H, Colley R, Bower R, Duty V, Schwartz-Fulton J, Fischer J. Association  
724 between microorganism growth at the catheter insertion site and colonization of the  
725 catheter in patients receiving total parenteral nutrition. *Surgery*. 1982;92:720-7.
- 726 62. Mastropaolo M, Evans N, Byrnes M, Stevens A, Robertson J, Melville S. Synergy  
727 in polymicrobial infections in a mouse model of type 2 diabetes. *Infection and Immunity*.  
728 1982;73:6055-63.
- 729 63. Sibley C, Parkins M, Rabin H, Surette M. The relevance of the polymicrobial nature  
730 of airway infection in the acute and chronic management of patients with cystic fibrosis.  
731 *Current Opinion in Investigational Drugs*. 2009;10:787-94.
- 732 64. Tomlin K, Coll O, Ceri H. Interspecies biofilms of *Pseudomonas aeruginosa* and  
733 *Burkholderia cepacia*. *Canadian Journal of Microbiology*. 2001;47:949-54.
- 734 65. Bragonzi A, Farulla I, Paroni M, Twomey K, Pirone L, Lore N, et al. Modelling co-  
735 infection of the cystic fibrosis lung by *Pseudomonas aeruginosa* and *Burkholderia*  
736 *cenocepacia* reveals influences on biofilm formation and host response. *PLoS ONE*.  
737 2012;7:e52330.
- 738 66. Lopes S, Ceri H, Azevedo N, Pereira M. Antibiotic resistance of mixed biofilms in  
739 cystic fibrosis: impact of emerging microorganisms on treatment of infection. *International*  
740 *Journal of Antimicrobial Agents*. 2012;40:260-3.
- 741 67. Elias S, Banin E. Multi-species biofilms: living with friendly neighbors. *FEMS*  
742 *Microbiology Reviews*. 2012;36:990-1004.
- 743 68. Huse H, Kwon T, Zlosnik J, Speert D, Marcotte E, Whiteley M. *Pseudomonas*  
744 *aeruginosa* Enhances Production of a Non-Alginate Exopolysaccharide during Long-  
745 Term Colonization of the Cystic Fibrosis Lung. *PloS ONE*. 2013;8:e82621.
- 746 69. Starkey M, Hickman J, Ma L, Zhang N, De Long S, Hinz A, et al. *Pseudomonas*  
747 *aeruginosa* rugose small-colony variants have adaptations that likely promote persistence  
748 in the cystic fibrosis lung. *Journal of Bacteriology*. 2009;191:3492-503.

749 70. Evans T. Small colony variants of *Pseudomonas aeruginosa* in chronic bacterial  
750 infection of the lung in cystic fibrosis. *Future Microbiology*. 2015;10:231-9.

751 71. Malone J. Role of small colony variants in persistence of *Pseudomonas*  
752 *aeruginosa* infections in cystic fibrosis lungs. *Infection and Drug Resistance*. 2015;8:237-  
753 47.

754

## 755 **Supporting information**

756 **S1 Fig. *S. aureus* monocultures grow very poorly compared with *P. aeruginosa***  
757 **monocultures under the same conditions.** This indicates that *S. aureus* does not  
758 strongly compete with *P. aeruginosa* for growth resources. (A) In shaken liquid culture  
759 over 40 hours of growth after inoculation, *P. aeruginosa* cultures attain optical densities  
760 ~4-5 times higher than corresponding *S. aureus* cultures. Optical density is roughly  
761 proportional to the density of bacteria. (B) In flow cells in monoculture, the average  
762 number density of *S. aureus* slowly declines. Error bars are standard error of the mean.

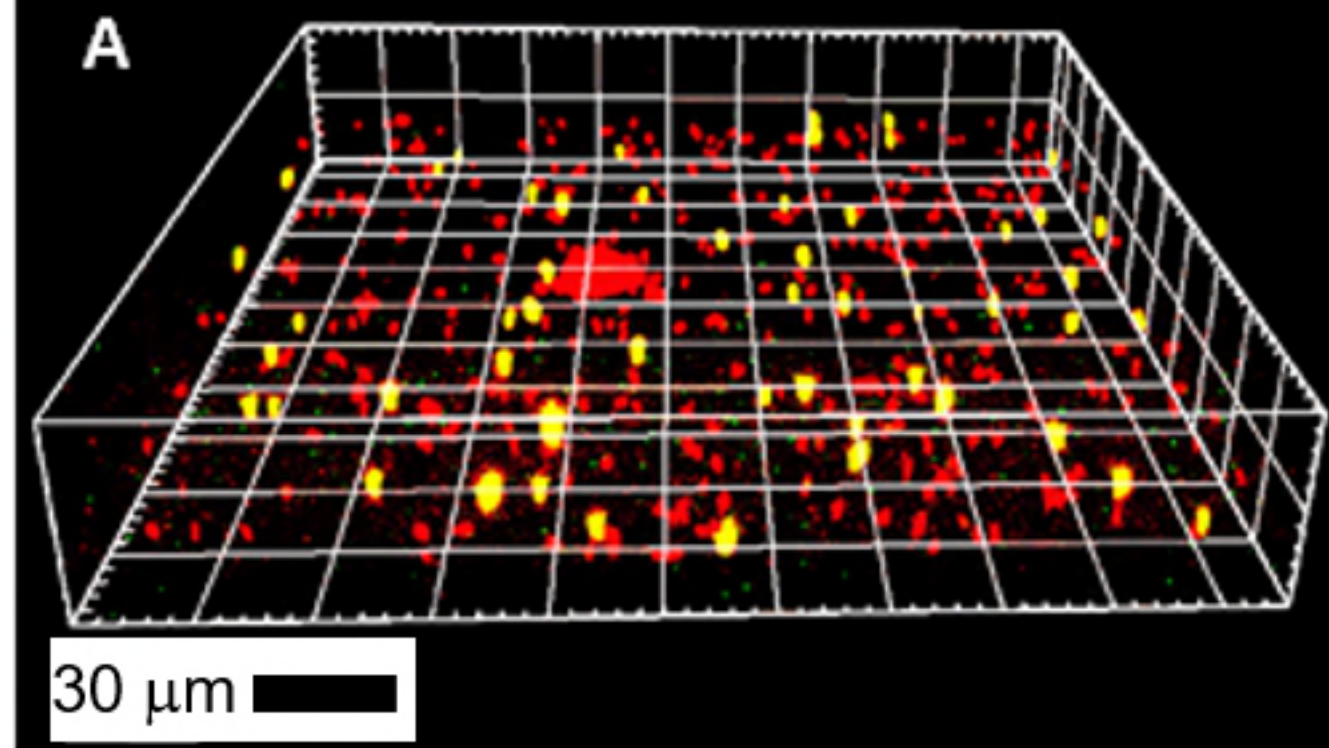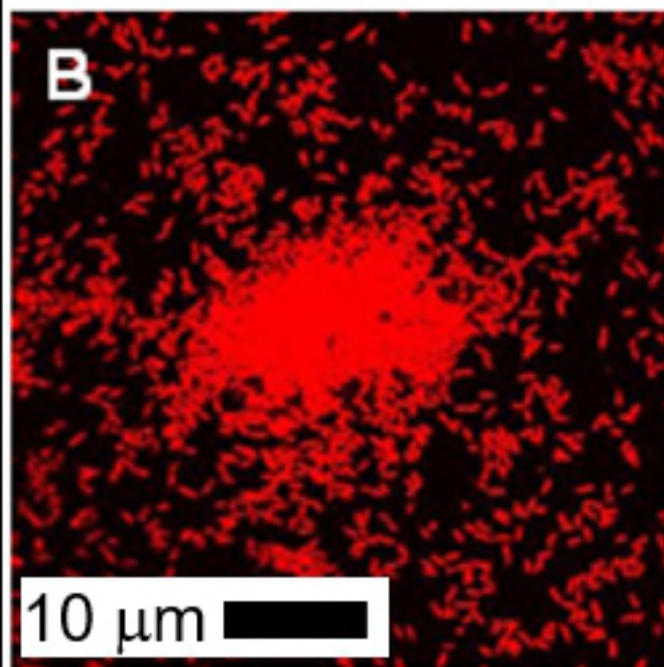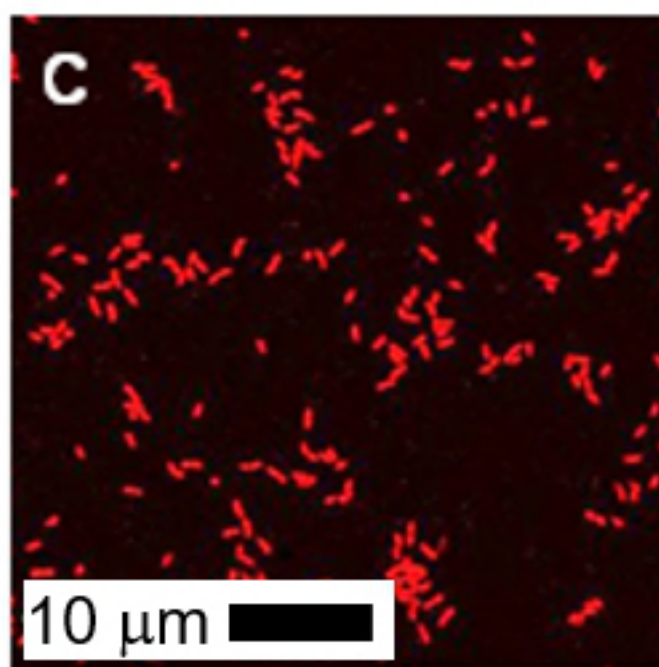

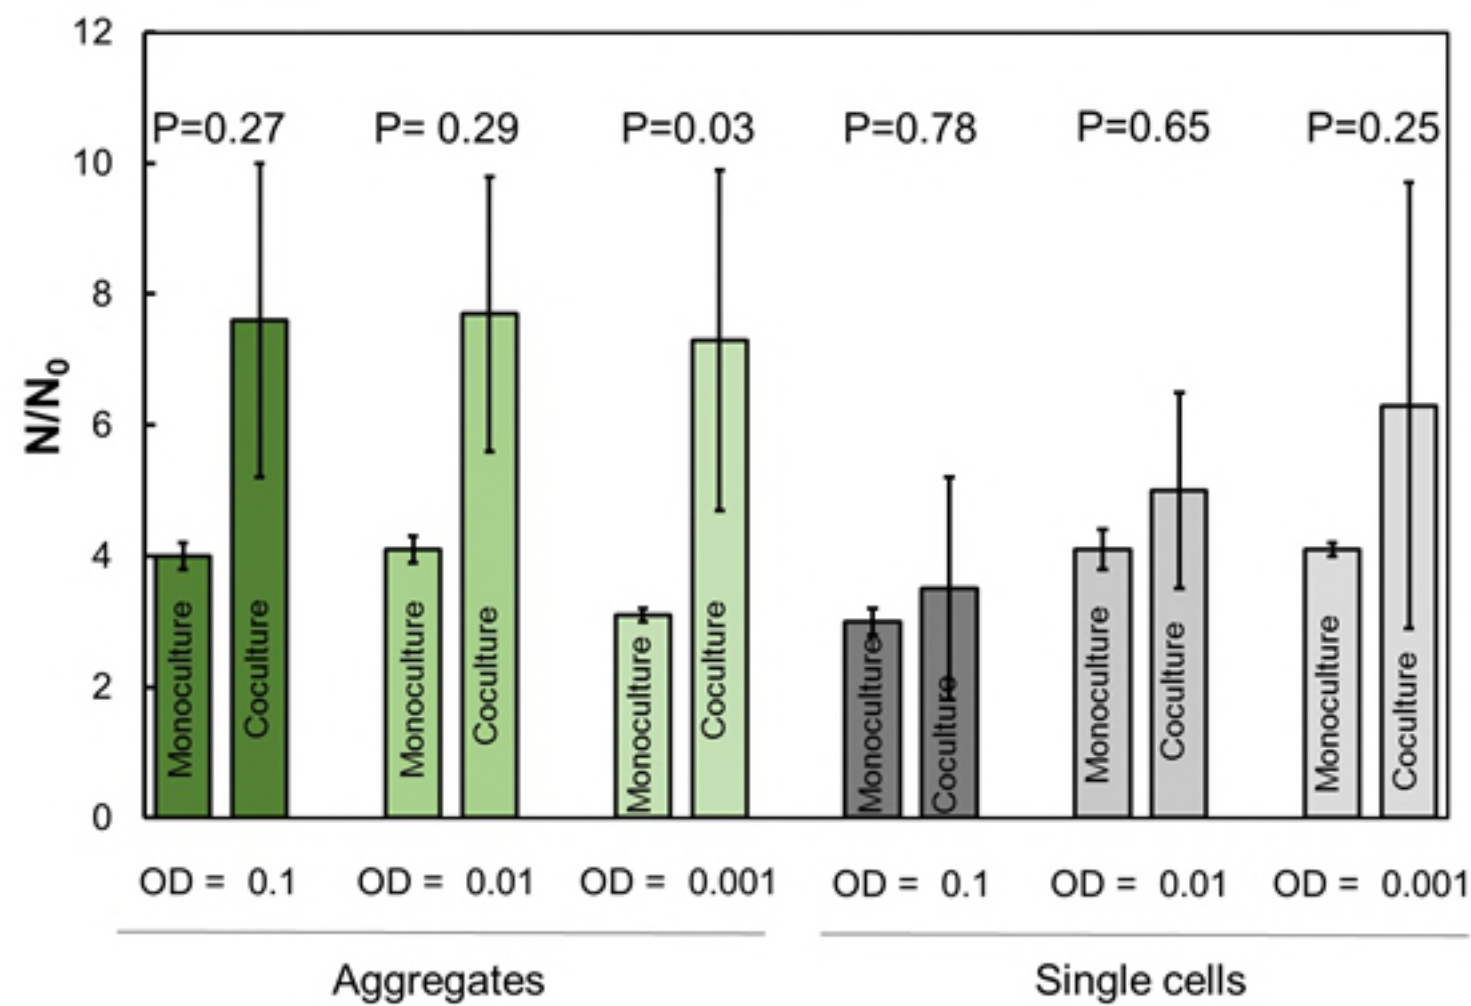

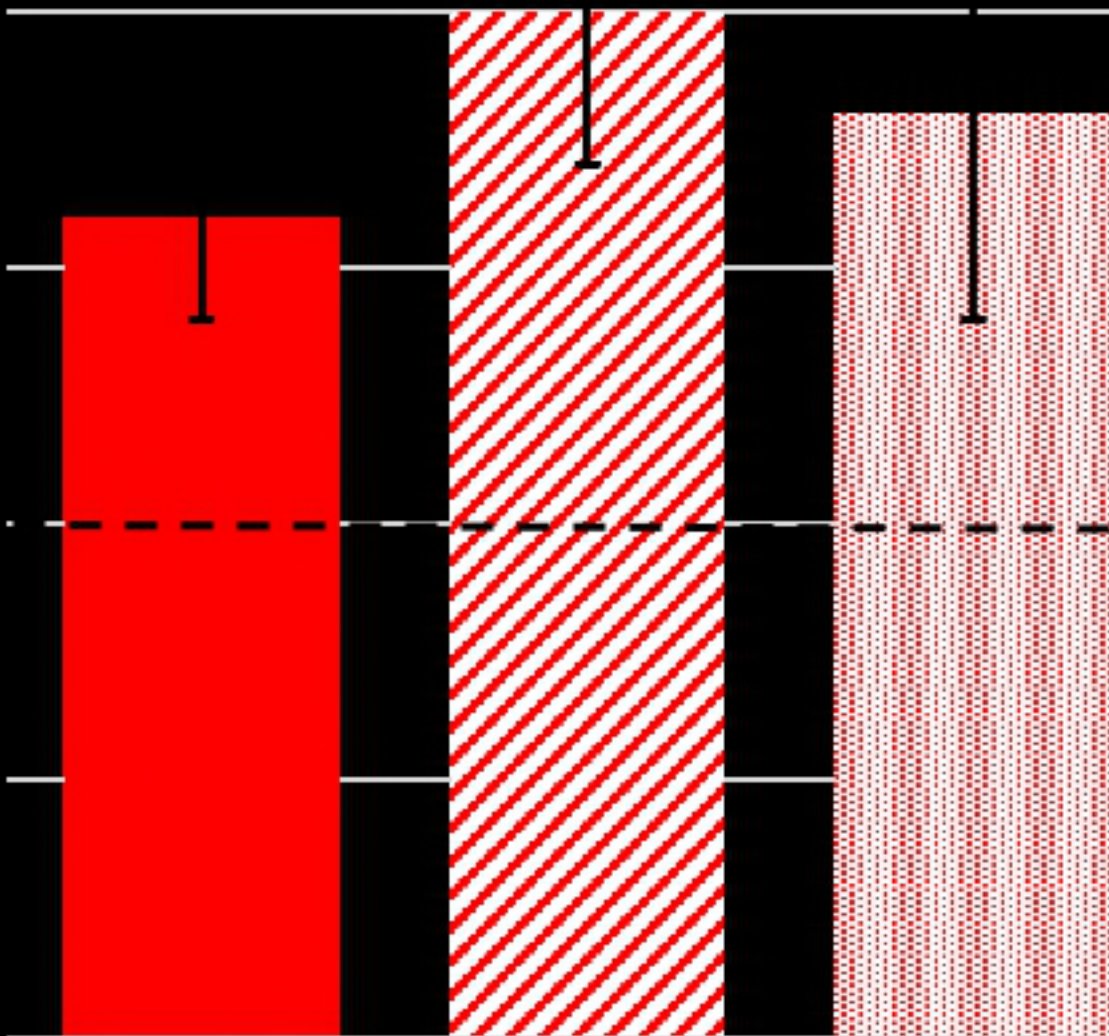



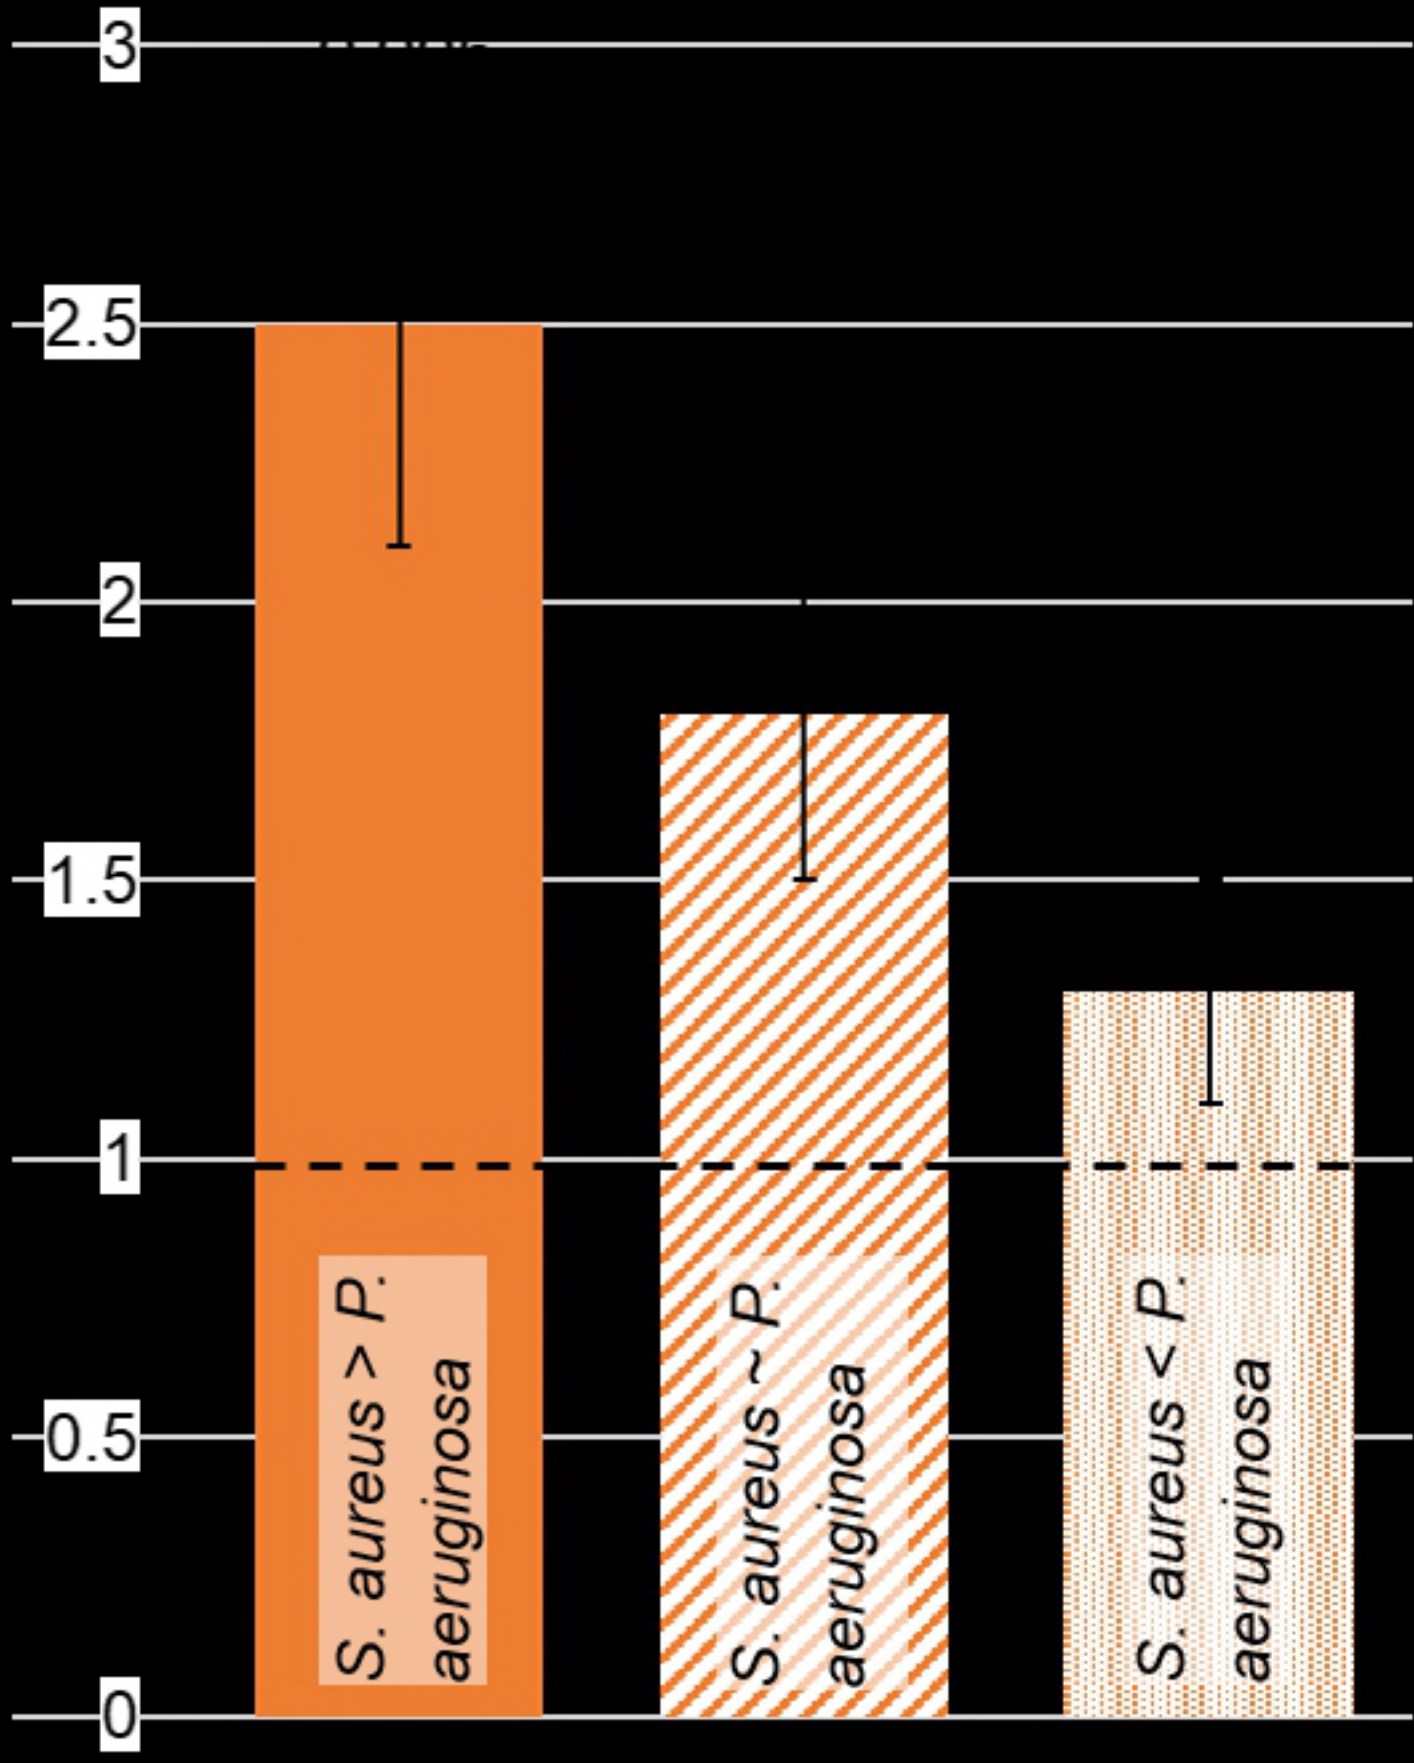

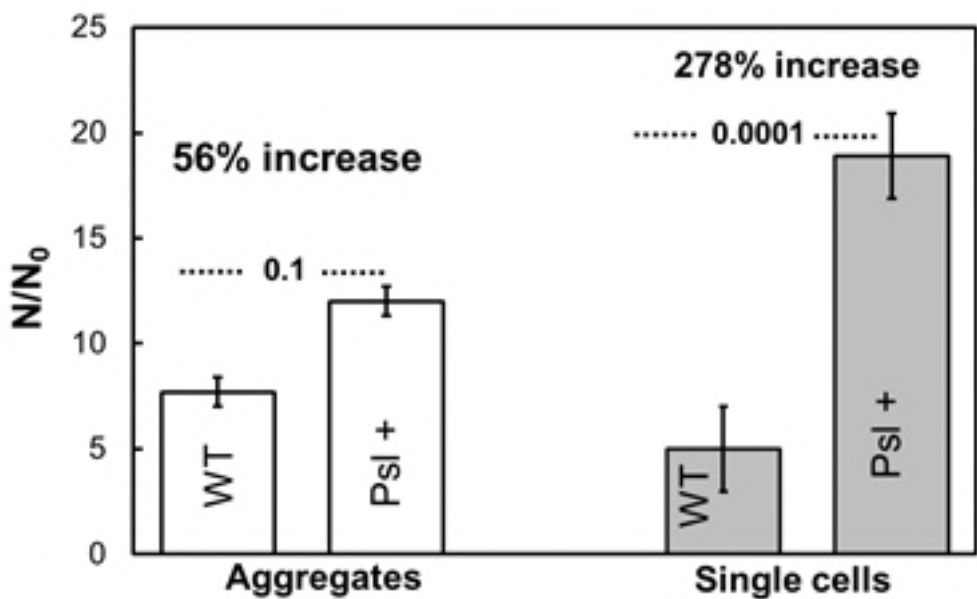

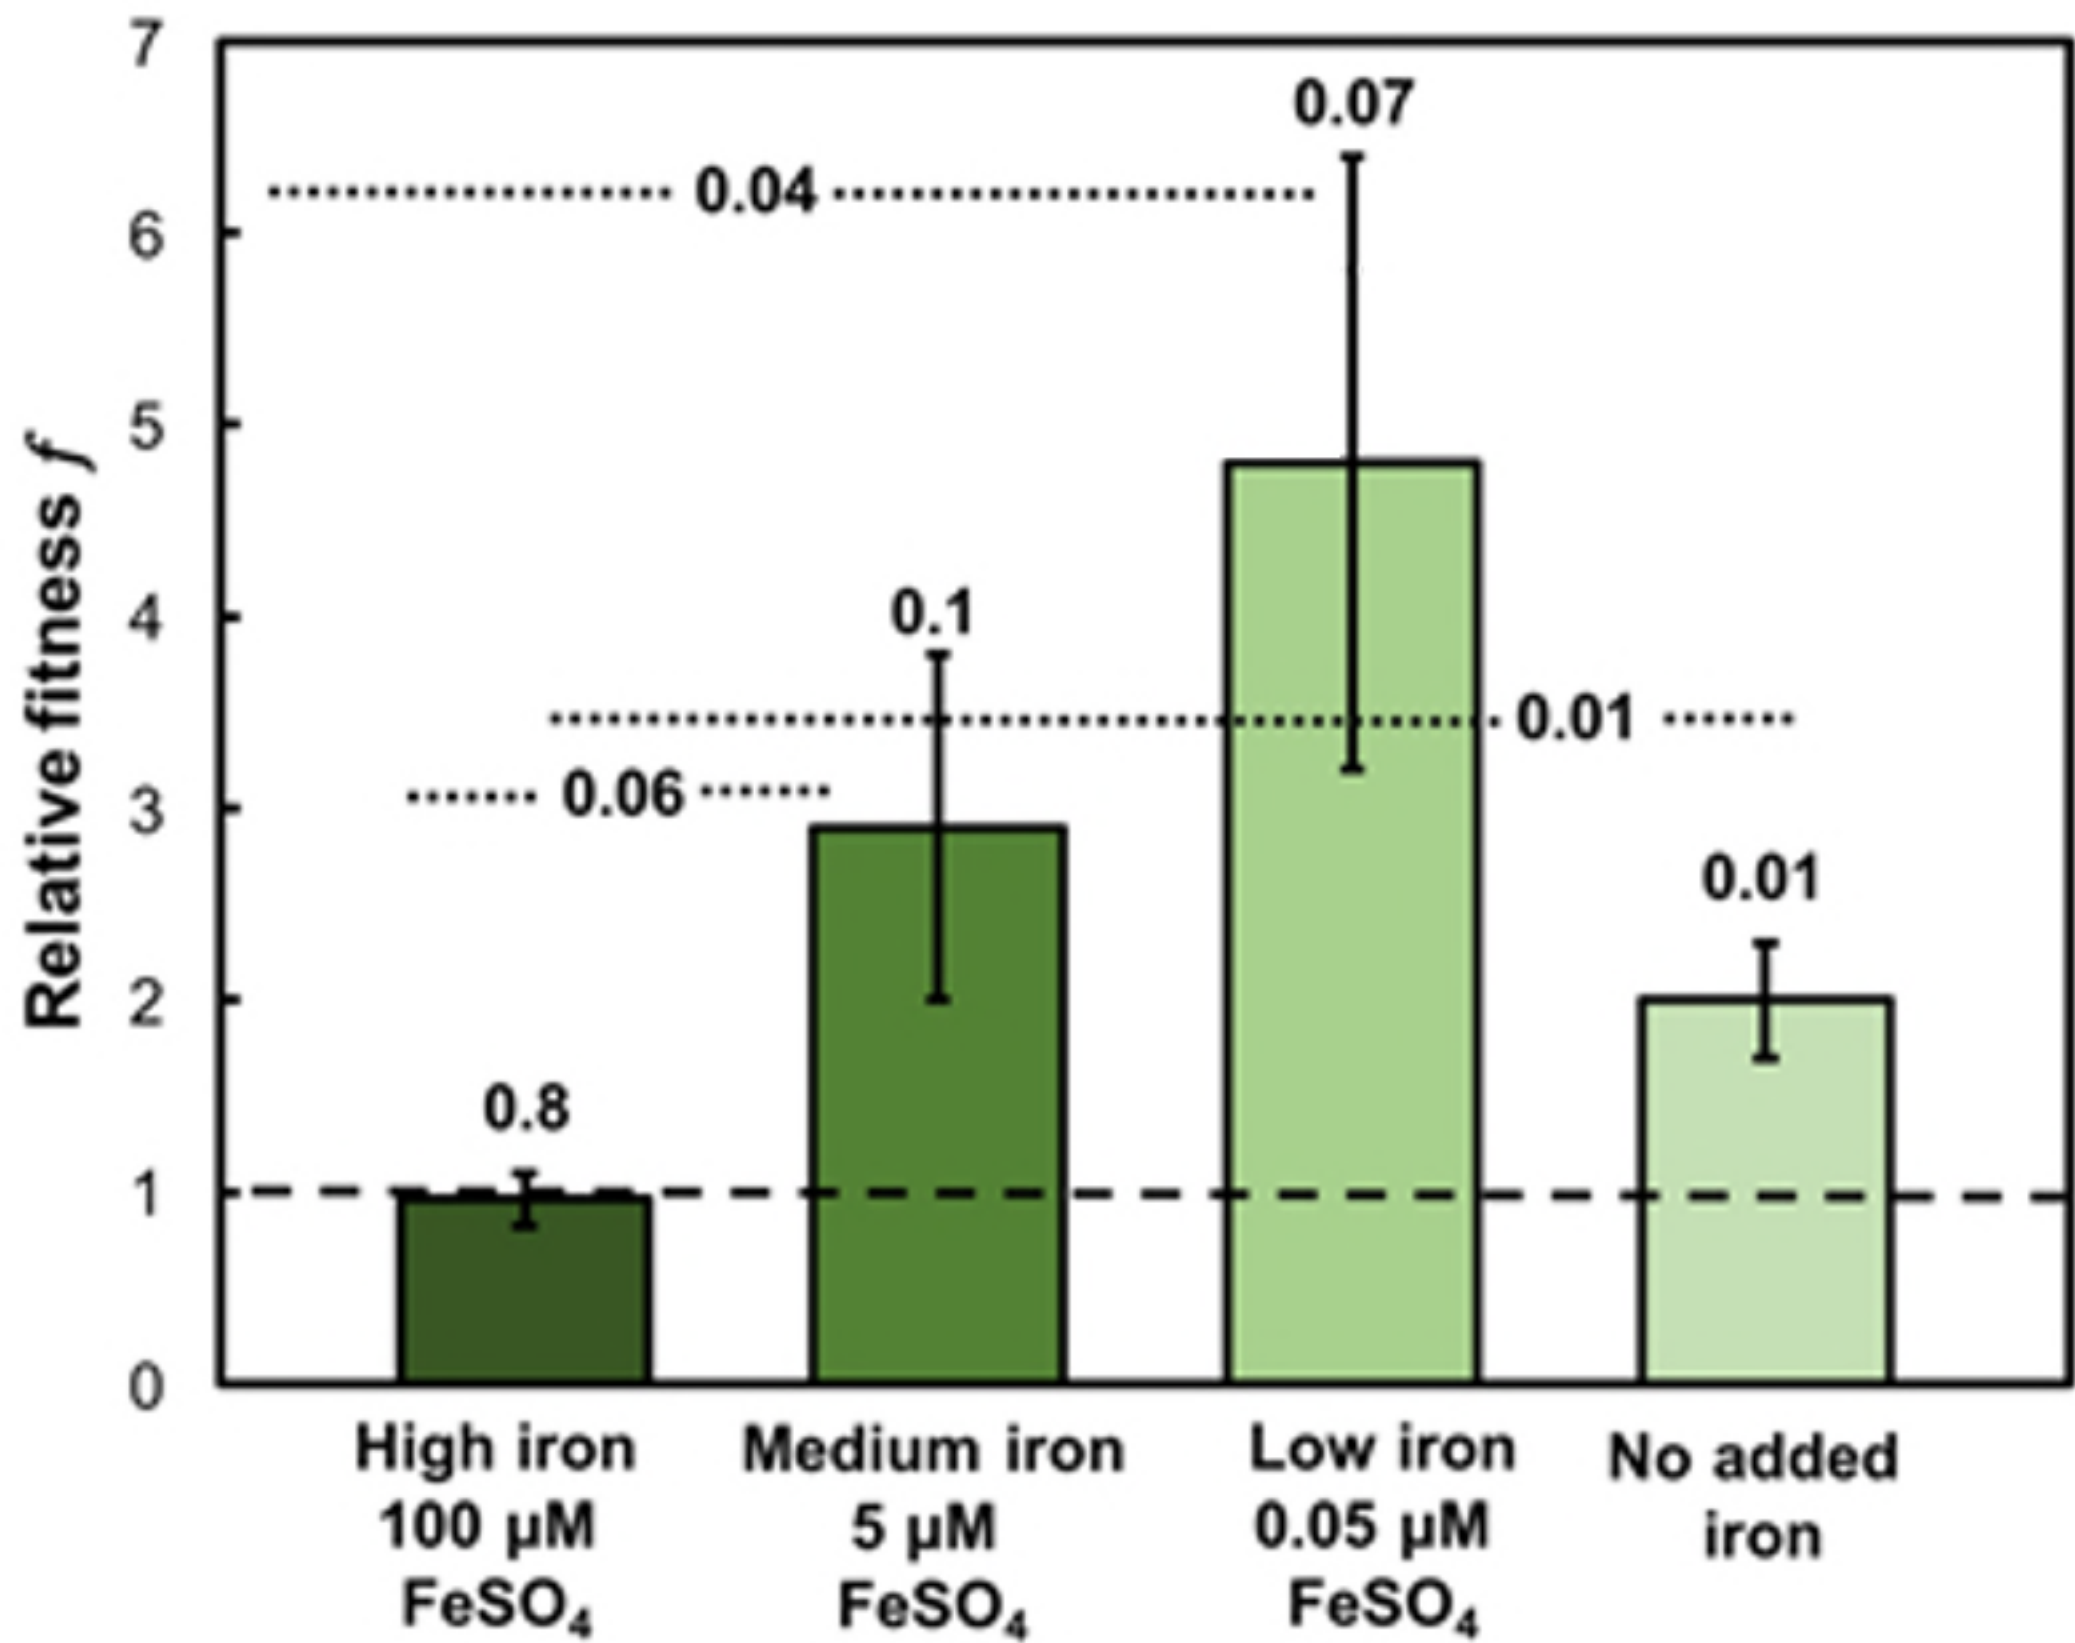

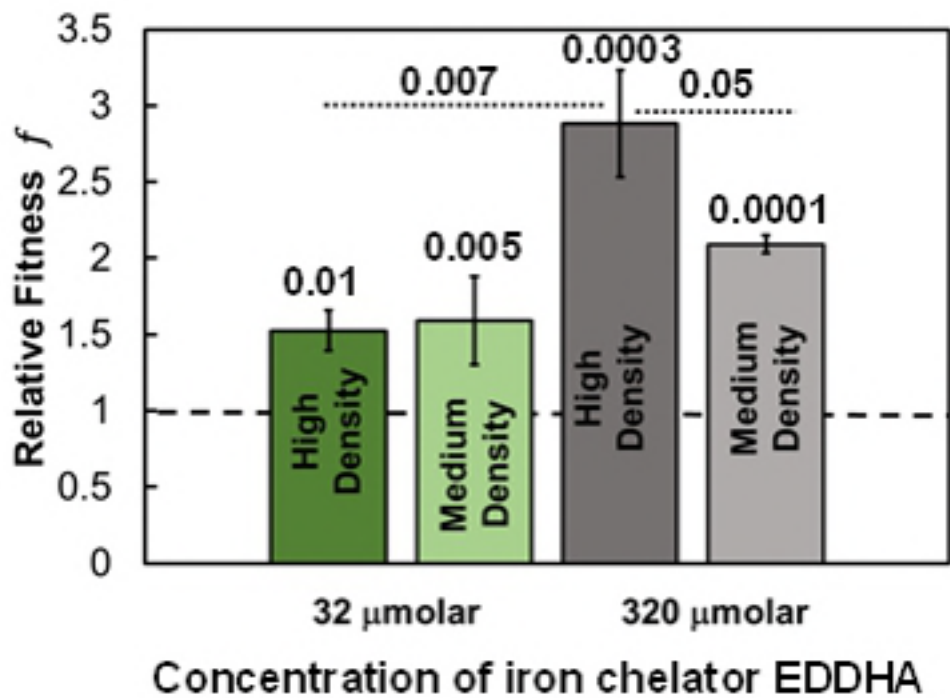

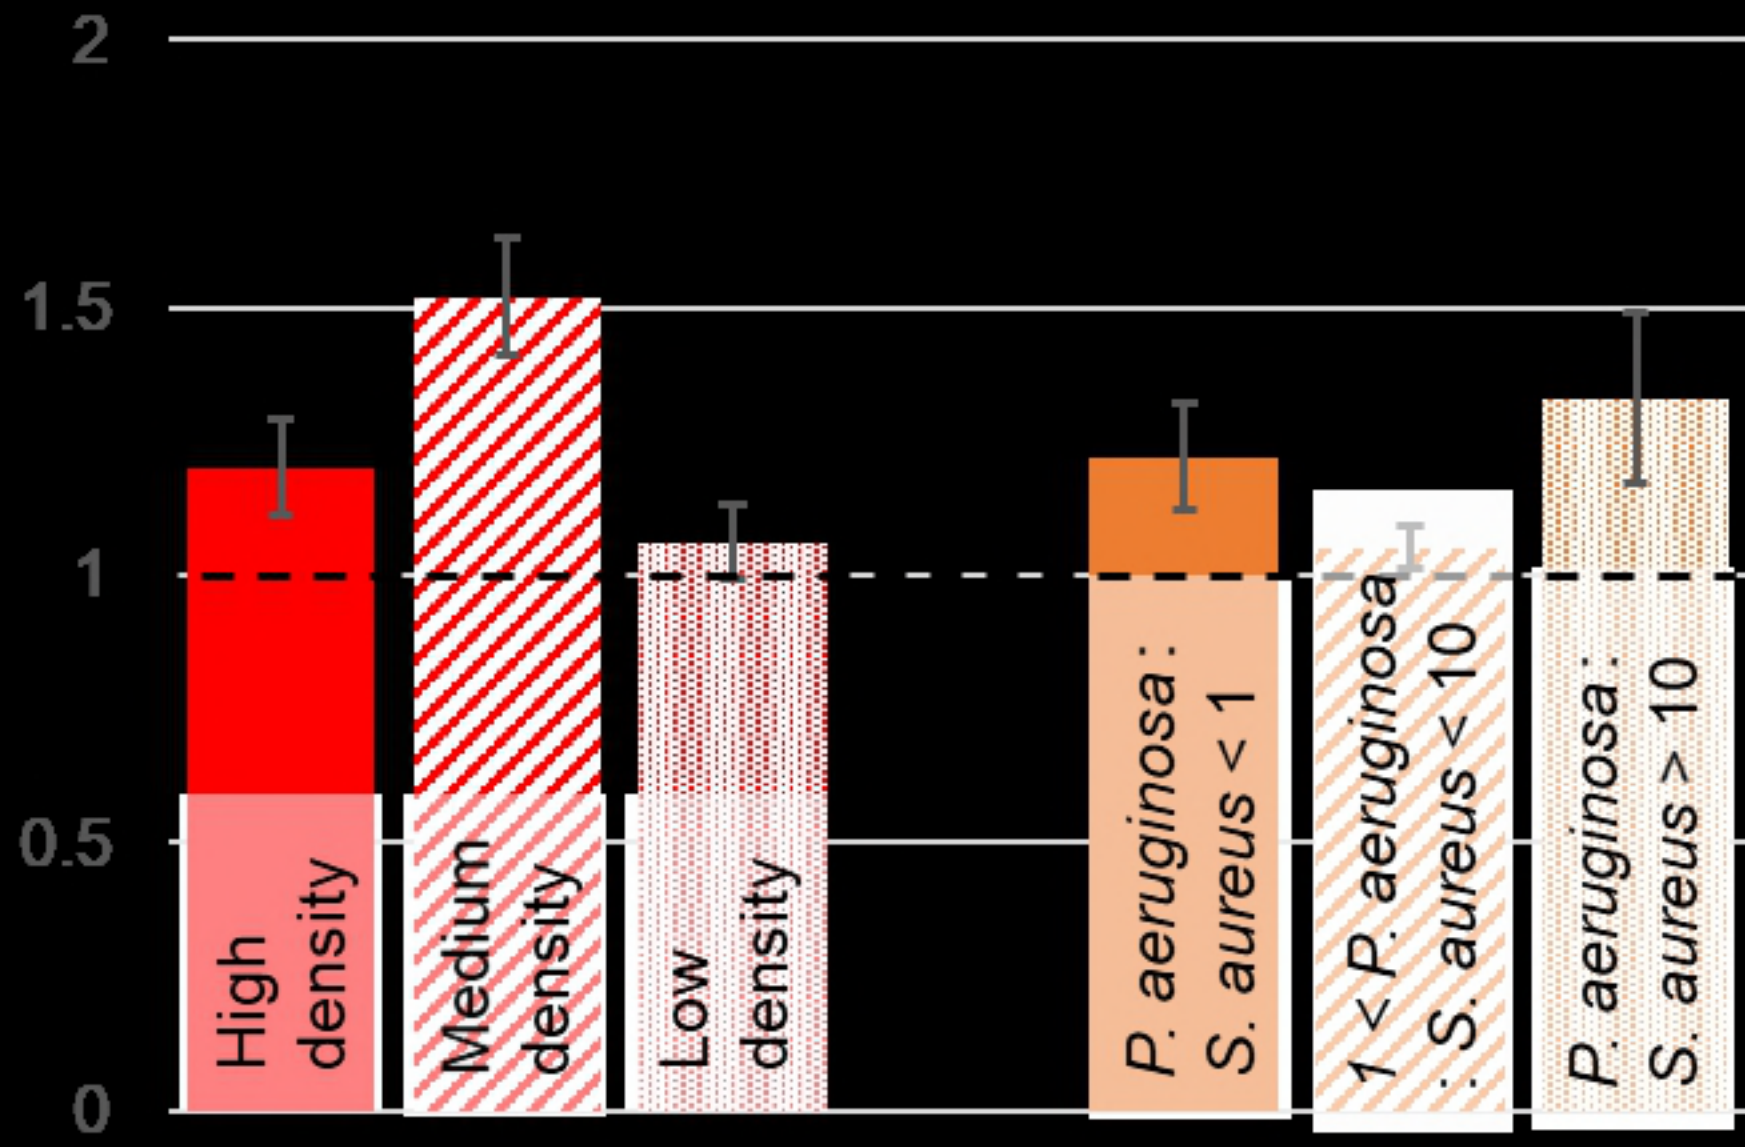

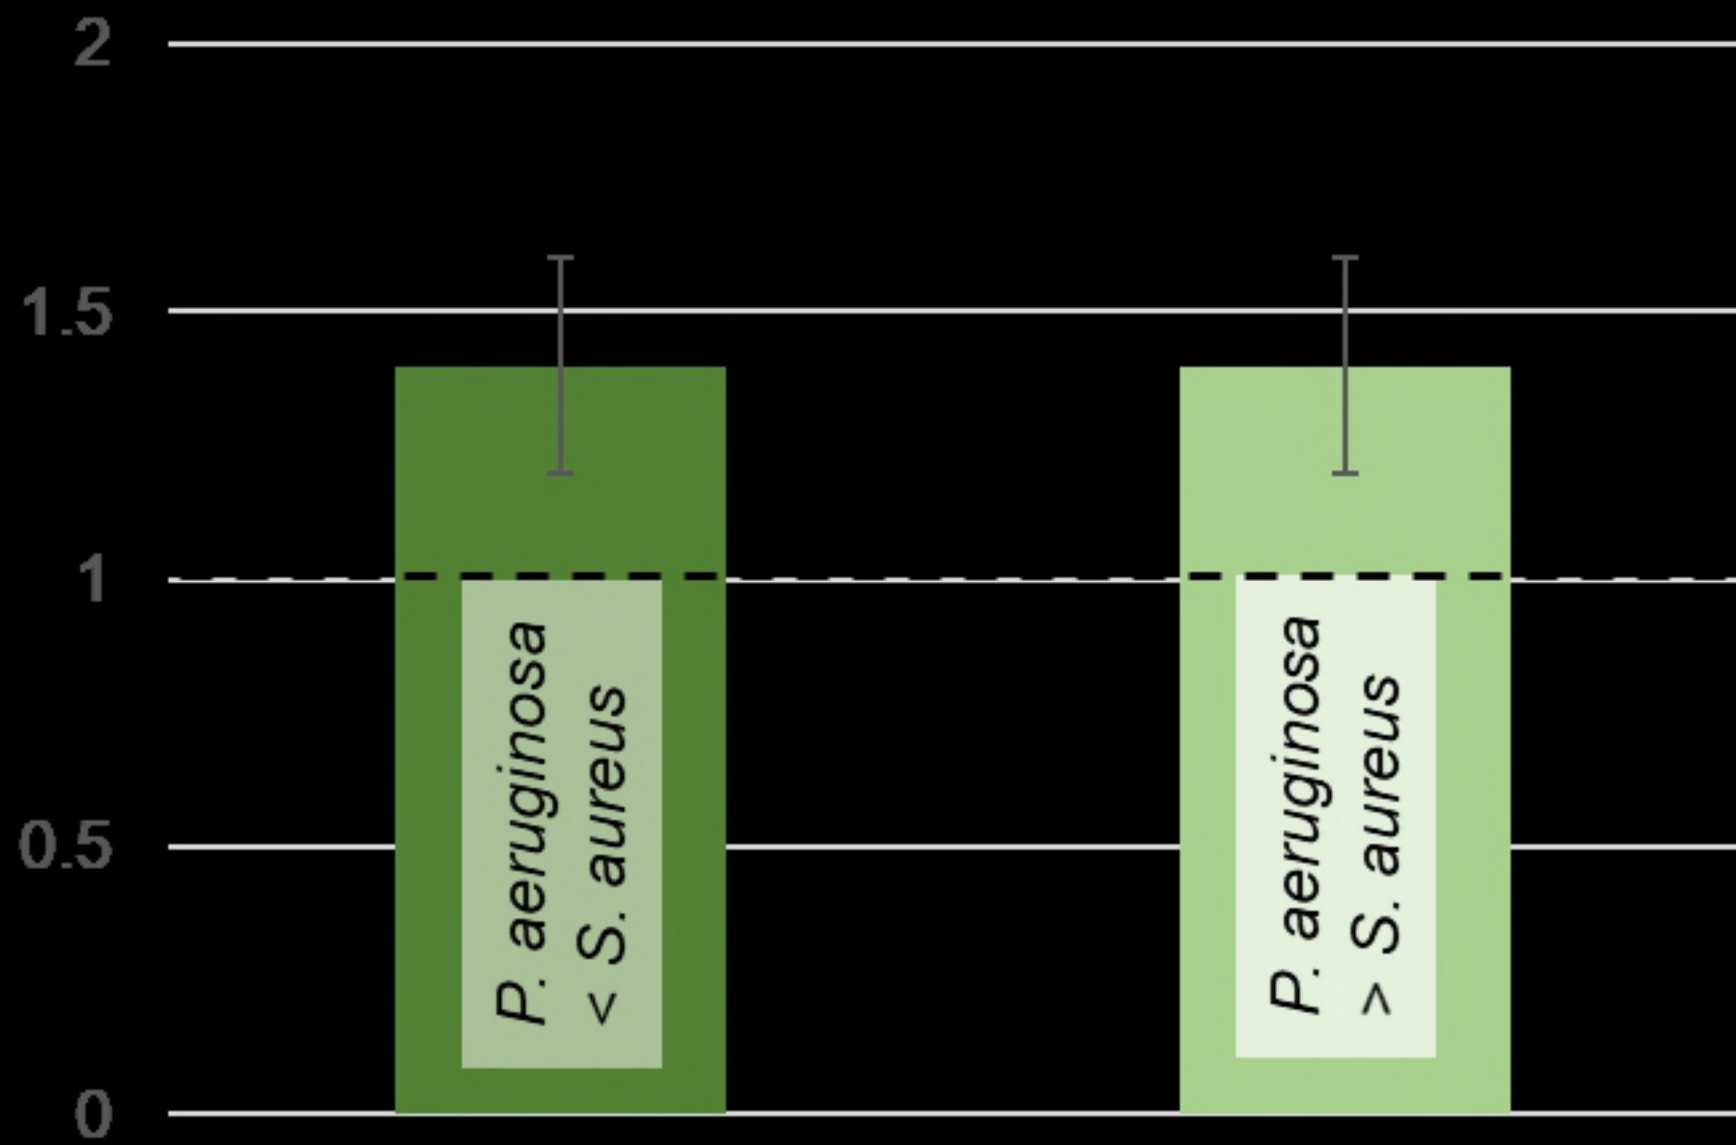

Source: https://www.biorxiv.org/content/10.1101/355339v1.full.pdf
